1 **North Andean origin and diversification of the largest ithomiine butterfly genus**

2

3

4 Donna Lisa De-Silva<sup>1</sup>, Luísa L. Mota<sup>2</sup>, Nicolas Chazot<sup>1,3</sup>, Ricardo Mallarino<sup>4</sup>, Karina L. Silva-Brandão<sup>5</sup>,  
5 Luz Miryam Gómez Piñerez<sup>6,7</sup>, André V.L. Freitas<sup>2</sup>, Gerardo Lamas<sup>8</sup>, Mathieu Joron<sup>9</sup>, James Mallet<sup>4</sup>,  
6 Carlos E. Giraldo<sup>6</sup>, Sandra Uribe<sup>6</sup>, Tiina Särkinen<sup>10</sup>, Sandra Knapp<sup>11</sup>, Chris D. Jiggins<sup>12</sup>, Keith R.  
7 Willmott<sup>13</sup>, Marianne Elias\*<sup>1</sup>

8

9 1. Institut de Systématique, Évolution, Biodiversité, ISYEB - UMR 7205 – CNRS MNHN UPMC  
10 EPHE, Muséum National d'Histoire Naturelle, Sorbonne Universités, 57 rue Cuvier CP50 F-  
11 75005, Paris, France.

12 2. Departamento de Zoologia and Museu de Zoologia, Instituto de Biologia, Universidade Estadual  
13 de Campinas, Campinas, São Paulo, Brazil.

14 3. Department of Biology, Lund University, Lund, Sweden

15 4. Department of Organismic and Evolutionary Biology, Harvard University, Cambridge, MA 02138,  
16 USA.

17 5. Centro de Biologia Molecular e Engenharia Genética, Universidade Estadual de Campinas,  
18 Campinas, São Paulo, Brazil

19 6. Universidad Nacional de Colombia, sede Medellín, Medellín, Colombia.

20 7. Grupo de investigación Ciencias Forenses y Salud, Tecnológico de Antioquia,

21 8. Museo de Historia Natural, Universidad Nacional Mayor de San Marcos, Lima, Peru.

22 9. Centre d'Ecologie Fonctionnelle et Evolutive, CEFE, UMR 5175 CNRS - EPHE - Université de  
23 Montpellier - Université Paul Valéry Montpellier, 34293 Montpellier 5, France.

24 10. Royal Botanic Garden Edinburgh, 20A Inverleith Row, Edinburgh EH3 5LR, U.K.

25 11. Department of Life Sciences, Natural History Museum, Cromwell Road, London SW7 5BD, U.K.

26 12. Department of Zoology, University of Cambridge, Cambridge, U.K.

27 13. McGuire Center for Lepidoptera and Biodiversity, Florida Museum of Natural History, University  
28 of Florida, Gainesville, Florida 32611, USA.

29

30

31 The Neotropics harbour the most diverse flora and fauna on Earth. The Andes are a major centre of  
32 diversification and source of diversity for adjacent areas in plants and vertebrates, but studies on insects  
33 remain scarce, even though they constitute the largest fraction of terrestrial biodiversity. Here, we  
34 combine molecular and morphological characters to generate a dated phylogeny of the butterfly genus  
35 *Pteronymia* (Nymphalidae: Danainae), which we use to infer spatial, elevational and temporal  
36 diversification patterns. We first propose six taxonomic changes that raise the generic species total to 53,  
37 making *Pteronymia* the most diverse genus of the tribe Ithomiini. Our biogeographic reconstruction  
38 shows that *Pteronymia* originated in the Northern Andes, where it diversified extensively. Some lineages  
39 colonized lowlands and adjacent montane areas, but diversification here remained scarce. The recent  
40 colonization of lowland areas was reflected by an increase in the rate of evolution of species elevational  
41 ranges towards present. By contrast, speciation rate decelerated with time, with no extinction. The  
42 geological history of the Andes and adjacent regions have likely contributed to *Pteronymia*  
43 diversification by providing compartmentalized habitats and an array of biotic and abiotic conditions, and  
44 by limiting dispersal between some areas while promoting interchange across others.

45

46 Correspondence should be addressed to M.E. (elias@mnhn.fr)

47

## 48 **Introduction**

49 The Neotropical region is the most biologically diverse area on Earth for most organisms and  
50 numerous studies have identified the world's longest mountain range, the Andes, as a major centre of  
51 biodiversity<sup>1</sup> and source for adjacent areas in groups as diverse as birds<sup>2</sup>, reptiles<sup>3</sup>, insects<sup>4-6</sup> and plants<sup>7,8</sup>.  
52 The Andes, has been proposed as a major driver of diversification<sup>9</sup>. For instance, studies of some Andean  
53 plants have found some of the fastest diversification events reported, such as in the Andean Bellflowers,  
54 whose 550 species arose in the last 5 million years<sup>8</sup>. The Andes may have affected diversification rates in  
55 different ways, by offering scope for vicariant speciation due to the complex and intricate topography of  
56 the mountains, as well as by providing a large array of new environmental niches, thereby promoting  
57 adaptive speciation.

58 The timing of diversification within the Neotropical region is keenly debated and is linked to  
59 competing hypotheses about which biogeographic events have primarily driven speciation, extinction and  
60 dispersal events during the Cenozoic. However, the rate and geographic extent of surface uplift in the  
61 Andes is contentious, having varied through time and among different cordilleras<sup>10,11</sup>, and assessing the  
62 role of the Andes and the different phases of uplift on the timing of diversification is complex. The  
63 closure of the Panamanian Isthmus during the last 5 million years may have allowed substantial biotic  
64 interchange between Central and South America (but see<sup>12</sup>) or the Pebas system, a large network of  
65 shallow lakes and wetlands, which occupied the upper Amazon region, may have constrained dispersal  
66 and promoted local diversification until its drainage around 10-7 million years ago<sup>13,14</sup>. It is also  
67 suggested that climatic instability during the Pleistocene drove the diversification of extant Neotropical  
68 species, however, the importance of this mechanism remains controversial<sup>9,15-19</sup>.

69 Insects represent the largest fraction of terrestrial biodiversity but analyses of insect diversification  
70 remain scarce compared to other groups such as vertebrates and plants. Butterflies are one of the best  
71 studied insect groups and around 7800 Neotropical species have so far been documented<sup>20</sup>. Over the last  
72 decade, an increasing number of studies have used molecular phylogenetic trees to investigate the timing  
73 and mode of diversification in a variety of butterfly groups. Such works provide scope for comparative  
74 approaches that can help decipher whether common drivers or distinct processes have shaped patterns of  
75 diversification. They also allow us to assess the extent to which inferred patterns of diversification match  
76 those found in other organisms, particularly well-studied plants<sup>21-23</sup> and birds<sup>2,24</sup>. Many butterfly studies  
77 indicate an important role for the Andes in the origin and diversification of new species. In some groups,  
78 diversification occurs mostly within the same elevational range, consistent with adaptation onto new  
79 resources (e.g., *Hypanartia*<sup>25</sup>, *Lymanopoda*<sup>26</sup>, some ithomiine butterflies<sup>6,27</sup>), whereas others show  
80 speciation across the elevational gradient (e.g., *Ithomiola*<sup>28</sup>). Even within some predominantly lowland  
81 groups the Andes have apparently played an important role, causing diversification contemporaneous

82 with the Andean uplift and consequent major changes in climate and geography in the Neotropical region  
83 (e.g., *Taygetis*<sup>29</sup>, *Dione*<sup>30</sup>, *Heliconius*<sup>31</sup>). By contrast, the Andes seem to have had a limited impact on the  
84 diversification of some other groups, such as neotropical Troidini<sup>32</sup>

85 The Neotropical butterfly tribe Ithomiini (Nymphalidae: Danainae) is a diverse group with ca. 48  
86 genera and 390 species, which are ubiquitous in humid forest throughout the Neotropical region from sea  
87 level to around 3000 m elevation. Commonly known as the clearwing butterflies because of the  
88 transparent wings in many species, they are well-known because of their involvement in Mullerian  
89 mimicry rings, whereby co-occurring unpalatable species converge in wing colour pattern amongst  
90 themselves, other Lepidoptera and some other insects<sup>33</sup>. Their diversity and broad distribution makes  
91 them a relevant study system to investigate patterns of spatial and temporal diversification in the  
92 Neotropics and they have previously been the focus of a number of diversification studies<sup>4,6,34,35</sup>. Most  
93 ithomiine clades have been found to show a peak of species richness in the Andes<sup>36</sup>, but the  
94 biogeographic histories that have led to this pattern are surprisingly diverse. The genus *Napeogenes*  
95 originated in the Andes and subsequently dispersed out of the mountains into the Amazon Basin<sup>6</sup>,  
96 whereas rates of colonization into the Andes from adjacent areas were found to be higher in the subtribe  
97 Godyrina<sup>34</sup>. The genus *Oleria* contains two main subclades, one of which diversified mainly in lowland  
98 Amazonian forests while the other diversified almost exclusively in high elevation Andean cloud forests<sup>4</sup>.

99 The genus *Pteronymia* Butler & Druce 1872, which belongs to the largest ithomiine subtribe, the  
100 Dircennina, is one of the most speciose ithomiine genera. The genus contains some 50 species (Lamas,  
101 2004), although the species taxonomy has been highly confused in the past and is undergoing revision.  
102 *Pteronymia* butterflies occur throughout the Neotropics, with the most diverse communities found in east  
103 Andean cloud forests<sup>27</sup>. As part of our on-going effort to document patterns of spatial and temporal  
104 diversification of butterflies in the Neotropics, here we reconstruct a comprehensive, time calibrated  
105 phylogeny for the *Pteronymia* using multi-locus molecular data and morphological characters. We first  
106 assess whether *Pteronymia* is monophyletic and whether do species boundaries require re-definition. We  
107 then time-calibrate the phylogeny using a combination of larval host plant ages (Solanaceae) as maximal  
108 age constraints<sup>37</sup> and estimates of divergence time between nymphalid butterfly genera from Wahlberg et  
109 al. (2009)<sup>38</sup> to investigate biogeographical of diversification of *Pteronymia* in relation with the Andean  
110 uplift. Specifically, we addressed the following questions: (1) Have the Andes acted as a centre of origin  
111 and a centre of diversification for the genus *Pteronymia*? (2) Has there been many interchanges between  
112 the different regions of the Neotropics, particularly between the Andes and other regions, and between  
113 the central and northern Andes? (3) How has the elevational niche of *Pteronymia* species evolved through  
114 time, and is there evidence for adaptive radiation across elevation ranges? (4) How has *Pteronymia*  
115 diversified through time?

116

## 117 **Results**

118 We obtained sequence data for a total of 166 *Pteronymia* specimens, representing 41 of the species  
119 recognized prior to our revision, and 47 of the species recognized after our revision (Table 1; see  
120 Supplementary Table S1 online). Species with no molecular data were *P. alcmena*, *P. alicia*, *P. calgiria*,  
121 *P. fumida*, *P. glauca* and *P. peteri*. A total of 87 morphological characters were coded for 52 species  
122 (after taxonomic revision, see below).

### 123 *Taxonomy*

124 Molecular phylogenies of all *Pteronymia* specimens generated by maximum likelihood and Bayesian  
125 inference were largely congruent (see Supplementary Figs. S1-S2 online), and showed that the genus  
126 *Pteronymia* is monophyletic. Several internal nodes had moderate to low support.

127 The molecular data suggested that several changes to the species-level taxonomy were warranted.  
128 Four cases concern species occurring on both slopes of the Andes, where the molecular data suggest that  
129 east and west Andean subspecies are not sister taxa, instead grouping with other related species. In all  
130 cases there are no genitalic characters that exclusively support the former classification, which was  
131 instead based on attempts to group similar allopatric phenotypes as subspecies of more widespread  
132 species<sup>20</sup>. We therefore split each of the original four species into east and west Andean species.

133 ***Pteronymia zerlina*** Hewitson, 1856. This species formerly included taxa from both east and west of  
134 the Andes<sup>20,39</sup>, ranging from Venezuela to western Ecuador and Bolivia. Sequenced material comes from  
135 eastern and western Ecuador, representing the taxa formerly known as *P. zerlina pronuba* Hewitson,  
136 1870 (west) and *P. zerlina machay* T. & L. Racheli, 2003 (east). *Pteronymia zerlina zerlina* Hewitson,  
137 1856 was described from 'New Granada' and the original illustrations and type material in the BMNH  
138 match specimens from the Cauca valley in west Colombia. Their smaller size and broad white forewing  
139 translucent band are similar to *P. zerlina pronuba* and it thus seems likely that these two taxa are  
140 conspecific. In the eastern Andes, populations throughout Peru apparently link east Ecuadorian *P. zerlina*  
141 *machay* with the Bolivian *P. zerlina alina* Haensch, 1909, and thus we treat *P. alina* as a distinct species  
142 (**rev. stat.**) and transfer to it the following Peruvian and Ecuadorian taxa: *P. a. machay*, *P. a. mielkei*  
143 Lamas, 2003 (**rev. stat.**). The status of Venezuelan and central Colombian populations is currently  
144 unknown, so for the moment we retain them in *P. zerlina*. The molecular results are consistent with  
145 significant differences in the immature stages of *P. zerlina zerlina* and *P. zerlina machay* (now *P. alina*  
146 *machay*) described by<sup>40</sup>, who also suggested the likelihood that these taxa were not conspecific.

147 ***Pteronymia veia*** Hewitson, 1853. This species formerly included taxa from both east and west of the  
148 Andes<sup>20,39</sup>, ranging from Venezuela to western Ecuador and northeastern Peru. Sequenced taxa include an  
149 undescribed taxon from western Ecuador and *P. veia linzera* Herrich-Schäffer, 1865 from eastern

150 Ecuador. As with *P. zerlina*, the status of Venezuelan and Colombian populations is unknown, but  
151 unfortunately there are no described west Colombian taxa which can be reliably associated with the  
152 undescribed west Ecuadorian taxon. We treated east and west Ecuadorian taxa as distinct species, but for  
153 the moment do not make any nomenclatural changes.

154 ***Pteronymia alissa*** Hewitson, 1869. This species formerly included taxa from both east and west of  
155 the Andes<sup>20,39</sup>, ranging from Venezuela to western Ecuador and Bolivia. Sequenced taxa include the  
156 nominate subspecies from western Ecuador, and *P. alissa andreas* Weeks, 1901 from eastern Ecuador.  
157 The status of Venezuelan taxa is currently uncertain, so for the moment we retain them in *P. alissa* and  
158 just separate the east Andean *P. andreas* (**rev. stat.**) as a separate species, except for the subspecies  
159 *dorothyae*, which clusters with *P. andreas* in the phylogenetic trees (see Supplementary Figs. S1-S2  
160 online).

161 ***Pteronymia teresita*** Hewitson, 1863. This species formerly included taxa from both east and west of  
162 the Andes<sup>20,39</sup>, occurring in western Ecuador and from eastern Colombia to Bolivia. Sequenced taxa  
163 include west Ecuadorian *P. teresita teresita* and east Ecuadorian *P. teresita thabena* (Hewitson, 1869).  
164 We here separate out east Andean populations as a separate species, which both share a distinctive female  
165 with colorless translucent hindwing and yellow translucent forewing, including the following: *P. thabena*  
166 *thabena*, *P. thabena denticulata* Haensch, 1905 (**rev. stat.**).

167 ***Pteronymia oneida*** Hewitson, 1855. This species formerly included taxa from western Colombia to  
168 Venezuela and along the eastern Andes to northern Peru<sup>20,39</sup>. *Pteronymia oneida asopo* (C. & R. Felder,  
169 1865) occurs in the Cordillera de la Costa in northern Venezuela, and appeared distantly related to east  
170 Ecuadorian *P. oneida oneida* in the molecular tree. As with related species (*P. zerlina*, *P. veia*), there are  
171 no genitalic characters that group *asopo* with *oneida*, and we therefore treat it as a distinct species, *P.*  
172 *asopo* (**rev. stat.**). The status of several other recently described<sup>39</sup> Venezuelan taxa of *P. oneida* remains  
173 to be determined, and for the moment they are retained in *P. oneida*.

174 ***Pteronymia picta*** Salvin, 1869. This species formerly included taxa ranging from Costa Rica to  
175 central and western Colombia. Specimen locality data from Colombia are too imprecise and unreliable to  
176 confirm whether the Colombian *P. picta dispar* Haensch, 1905, apparently restricted to the northern  
177 Cordilleras Occidental and Central, is sympatric or not with *P. picta picta*, the range of which appears to  
178 broadly encompass that of *dispar* in Colombia. The molecular data suggest that *P. dispar* (**rev. stat.**) is  
179 not closely related to *P. picta picta* and Central American *P. picta notilla* Butler & H. Druce, 1872.

180 After our taxonomic changes the genus *Pteronymia* now comprises 53 species, making it the most  
181 diverse ithomiine genus.

182

183 *Morphological phylogeny*

184 We performed a cladistic analysis of 87 adult and larval morphological traits, which resulted in a  
185 relatively poorly resolved tree, within which only several clades received moderate to strong support (see  
186 Supplementary Fig. S3 online). Notable clades include one containing six typically rare Andean species  
187 (*alida* clade: *P. alida*, *P. sp. nov. 3*, *P. inania*, *P. lonera*, *P. teresita* and *P. thabena*), supported by a  
188 number of genitalic characters. The immature stages (i. e., larvae and pupae) of this clade are also  
189 remarkably different in coloration and morphology from those of other *Pteronymia* species, and the  
190 distinctiveness of the genitalia and immature stages previously led to the description of a new genus,  
191 *Talamancana*, to include *P. lonera*<sup>41</sup>. A second, large and apparently well-defined clade contains *P.*  
192 *zerlina* and relatives, all of which have a very distinctive synapomorphy, a keel-like spine on the dorsal  
193 side of the aedeagus near the posterior tip (character 1:1). Genitalia barely differ among any of the eleven  
194 species in this clade, although the adult mimetic wing patterns and the immature stage morphology and  
195 biology show striking differences.

#### 196 197 *New calibration of the Solanaceae phylogeny*

198 To calibrate the phylogeny of *Pteronymia*, we used a combination of secondary calibrations of  
199 Nymphalidae ages<sup>38</sup> and maximum age constraints based on host-plant lineage ages (Solanaceae). To  
200 extract those ages, we used the molecular matrix of a previous Solanaceae phylogeny<sup>42</sup> to generate a new  
201 phylogeny, which was calibrated with the stem age of the family extracted from a dated phylogeny of  
202 Angiosperms<sup>43</sup>. Our Solanaceae phylogeny shows similar node support and topology to those of the latest  
203 published phylogeny of Solanaceae<sup>42</sup>. Median lineage ages are on average about 25% older and have  
204 wider 95% credibility intervals (Table 2, see Supplementary Fig. S4 online). In most lineages the 95%  
205 credibility intervals presented here span the median age of the published phylogeny of Solanaceae<sup>42</sup>, but  
206 the median ages themselves fall almost always outside the 95% credibility intervals of the previous  
207 phylogeny (Table 2). The wider credibility intervals in our study are due to the use of the more  
208 conservative uniform prior on the calibration point as compared to the previous phylogeny of Solanaceae,  
209 which implemented a log-normal prior that tends to drive ages towards the mode of the prior  
210 distribution<sup>42</sup>. Consequently, the ages of the lineages used for calibrating the phylogeny of *Pteronymia*  
211 are older than those inferred previously<sup>42</sup> (Table 2).

#### 212 213 *Dated combined Pteronymia phylogeny*

214 We combined morphological and molecular data to generate a species-level phylogeny that was  
215 calibrated using secondary calibrations from a published Nymphalidae phylogeny<sup>38</sup>, and from Solanaceae  
216 lineage ages estimated in this study, using BEAST 1.7.5<sup>44</sup>. The combination of morphological and  
217 molecular data generated a phylogeny comprising all known extant species (Fig. 1). Many nodes were

218 poorly supported, and this was mostly caused by the species represented only by morphological  
219 characters, whose placement was uncertain. Our calibration strategy that combined butterfly- and host-  
220 plant-derived secondary calibrations resulted in ages that were about 30 to 50% older than those inferred  
221 in a recent time-calibrated phylogeny of Ithomiini genera that relied on previous minimum age estimate  
222 of Solanaceae lineages<sup>37</sup>. By contrast, our ages were often slightly younger, but well within the credibility  
223 interval of the ages estimated in the Nymphalidae phylogeny<sup>38</sup>. Notably, the stem age of *Pteronymia*  
224 inferred in our study is 14.4 million years (my) [12.3 – 16.3], while it was 7.5 my [6.0 – 9.0] in the higher  
225 level Ithomiini phylogeny<sup>37</sup> and 15.7 my [11.5 – 18.5] in the Nymphalidae phylogeny<sup>38</sup>. We repeated this  
226 analysis without the Solanaceae calibrations and this had little impact on most nodes of the phylogeny.  
227 The greatest difference was found for the divergence between the outgroup genera *Athesis* and *Patricia*  
228 (22.9 million years ago (mya) [20.0 – 24.0] under the combined calibration scheme, 25.4 mya [21.8 –  
229 27.5] with Nymphalidae calibrations only). For the genus *Pteronymia*, ages under the two calibration  
230 schemes were extremely similar (regression ages Nymphalidae calibration only (N) versus combined  
231 Nymphalidae and Solanaceae (S):  $N = 0.989 * S$ ,  $r^2 = 0.997$ ). Trees generated under the combined  
232 calibration scheme were used in all subsequent analyses.

233 After splitting from its sister lineage (the clade composed of the genera *Episcada*, *Ceratinia*, and  
234 *Haenschia*) 14.4 mya [12.3 – 16.3], the genus *Pteronymia* started diversifying about 10.6 mya [9.0 –  
235 12.2], when it split into two major, but poorly supported, clades: the *P. sao* clade, 17 species, and the *P.*  
236 *oneida* clade, 36 species. The two main clades appearing in the morphological phylogeny were also  
237 recovered in the combined analysis, with the exception that *P. latilla* and *P. tucuna* grouped with two  
238 species in the *P. zerlina* clade. The male genitalia of both of the former species are rather different to  
239 remaining members of the *P. zerlina* clade, lacking the distinctive male genitalic synapomorphy of that  
240 clade in addition to also lacking a gnathos, the loss of which occurs within the genus only in *P. latilla*, *P.*  
241 *tucuna*, *P. sao* and *P. obscuratus*. Otherwise, none of the relationships implied in the combined  
242 phylogeny seem to contradict any strong morphological evidence.

243 Because of topological uncertainty of the *Pteronymia* phylogeny, we performed subsequent  
244 analyses both on the MCC tree and on a random subset of 100 trees from the posterior distribution.

#### 245 246 *Spatial patterns of diversification*

247 We used georeferenced records (Supplementary Fig. S5) to analyse the spatial patterns of  
248 diversification of *Pteronymia* across nine biogeographic areas (Fig. 2). We performed biogeographical  
249 analyses using the software RASP 2.1<sup>45</sup>. The analyses on the MCC tree and on the 100 trees yielded very  
250 similar results (Fig. 3, see Supplementary Fig S6 online), and only the analyses on the MCC tree are  
251 presented here. Our biogeographic reconstruction suggests that the most likely ancestral area for the



252 genus *Pteronymia* is the Western/Central Northern Andes (hereafter, Northern Andes), i.e., the area  
253 comprising the slopes of the Western and Central cordillera of Colombian (and Ecuadorian) Andes (Fig.  
254 3), although there is uncertainty as to whether the origin of the genus was limited to this area, or also  
255 spanned neighbouring regions (see Supplementary Fig S7 online). The two main clades (*P. oneida* and *P.*  
256 *sao* clades) also originated and started diversifying in the same area, with some uncertainty as to whether  
257 ancestral lineages spanned larger regions for the *P. oneida* clade (see Supplementary Fig. S6 online). A  
258 large proportion (55%) of speciation events occurred within the Northern Andes. In particular, the most  
259 likely ancestral area for the young and diverse *P. zerlina* clade was the slopes of the Northern Andes.  
260 Rapid diversification subsequently occurred within the last 3.6 my [3.0 – 4.3] in this clade, which is  
261 coincident with the final uplift of the Eastern Cordillera of Colombia and the Venezuelan Cordilleras c. 5-  
262 2 mya<sup>9</sup>. The Central Andes appear relatively species poor compared to the Northern Andes; only 13  
263 species occur in the Central Andes. These are the result of multiple independent colonization events (10  
264 events), and to a much lesser extent from local diversification (e. g., the clade encompassing *P. hara* and  
265 its sister clade, three species in this region). The oldest colonizations of the Central Andes were recovered  
266 in the *P. sao* clade (in the last 5.8 my [4.4 – 7.0]), where such colonizations happened at least five times.

267 A small number of lineages colonized the Upper and Lower Amazon regions. Only one dispersal  
268 event was followed by local diversification in Amazonia, in the *vestilla* clade (the clade encompassing *P.*  
269 *dispar* and its sister clade). Three other colonizations of Amazonia occurred independently throughout  
270 the phylogeny, resulting in an overall very low Amazonian diversity, particularly in the lower Amazon.  
271 All these events happened within the last 5.6 mya [4.8 – 6.7]. The two species that colonized the Atlantic  
272 Forest arose from Amazonian lineages, and did not result in local diversification. Conversely, a high  
273 number of independent colonization events (15, according to the maximum likelihood estimates)  
274 occurred from the Andes to Central America. Most of those colonizations occurred within the last 5.0 my  
275 [4.0 – 5.9]. Colonization time of Central America was highly uncertain for *P. fumida* and *P. spnov 4*,  
276 because these species split from their sister lineages 10.6 mya [9.0 – 12.2] and 7.0 mya [5.6 – 8.3],  
277 respectively, and may have therefore colonized Central America any time during those periods.  
278 Colonization of Central America was sometimes, but rarely given the high number of colonizations,  
279 followed by local speciation (e.g. *P. lonera* and *P. teresita*, *P. alcmena* and *P. gertschi*).

280

### 281 *Evolution of elevational range*

282 We investigated the evolution of the elevational range and mean elevation of *Pteronymia* species on  
283 the MCC tree and on 100 trees from the posterior distribution. The phylogenetic signal and the tempo of  
284 evolution of the elevational range and mean elevation were assessed by estimating simultaneously the  
285 maximum likelihood values of the  $\lambda$  and  $\delta$  branch scaling parameters<sup>46</sup>, respectively. A  $\lambda$  value of one

286 indicates that the phylogeny correctly represents the trait covariance among species (Brownian motion  
287 model of evolution), while  $\lambda < 1$  indicates that the phylogeny overestimates the trait covariance among  
288 species. A  $\delta$  value of one means that the trait evolves at a constant pace along branches of the tree;  $\delta < 1$   
289 indicates early changes in the character values followed by a slowing down of the evolution rate; while  $\delta$   
290  $> 1$  indicates accelerated evolution rate and species-specific adaptation. For the mean elevation and the  
291 elevational range, estimates of  $\lambda$  across all trees from the posterior distribution and for the MCC tree were  
292 not significantly different from one, meaning that trait evolution does not differ from a Brownian motion  
293 model. Estimates of  $\delta$  for the mean elevation were also not significantly different from one (Table 3). For  
294 the lower and upper boundaries of the elevational range, the estimates of  $\delta$  were significantly higher than  
295 one in  $>50\%$  of the trees of the posterior distribution (Table 3). The MCC tree showed significantly higher  
296 estimates of  $\delta$  for the lower boundary of the elevational range, but only marginally significant for the  
297 upper boundary (Table 3). Values of  $\delta$  higher than one indicate an acceleration of the rate of evolution of  
298 elevation range and species elevational specialisation. Results differ between the mean elevation and  
299 elevational range perhaps because the mean is less variable than the range (e.g., species with different  
300 elevational ranges may have similar elevation mean). Reconstructions of ancestral mean elevation and  
301 range boundaries accounting for the inferred  $\delta$  values are depicted on Fig. 4.

302

### 303 *Temporal patterns of diversification*

304 We first investigated heterogeneity among clades for speciation and extinction rates using  
305 MEDUSA<sup>47</sup> on the MCC tree and on 100 trees from the posterior distribution. No significant shift of  
306 diversification rates was found on the MCC tree. Five trees of the posterior distribution (5%) had at least  
307 one significant shift of diversification rates. Each of those shifts was found in less than 5% of the trees, and  
308 therefore considered as non-significant. We then investigated whether diversification rates varied through  
309 time by fitting time-dependent models of speciation and extinction rates<sup>48</sup>. The best fitting model was an  
310 exponential time-dependent speciation rate without extinction (Table 4). According to this model  
311 speciation rate decreased from 0.646 event per lineage per million year for the MCC tree and  $0.538 \pm 0.024$   
312 for the 100 trees at the origin of the genus (crown) to 0.148 for the MCC tree and  $0.159 \pm 0.002$  for the 100  
313 trees at present (Fig. 5). All other models, including the constant speciation rate model, were rejected at the  
314 threshold of  $\Delta AIC > 2$ , strengthening the support for a decreasing speciation rate through time.

315

### 316 **Discussion**

317 Our extensive molecular sampling of the genus *Pteronymia* encompassing multiple subspecies and  
318 combined with morphological and distributional data enabled us to redefine species boundaries in the  
319 genus, resulting in six additional recognized species in the genus. The resulting taxonomic changes now

320 make *Pteronymia* the most species-rich ithomiine genus, with 53 species. Morphological characters that  
321 are typically useful in diagnosing ithomiine species, such as in the genitalia and wing androconia, were  
322 clearly unhelpful in these cases, although mimetic wing pattern and life histories, where known, often did  
323 show significant variation. As knowledge of the biology of different populations and more material for  
324 molecular study become available, additional changes to the species taxonomy may be needed in future.  
325 At deeper levels of the phylogeny, despite *Pteronymia* showing some of the greatest diversity within the  
326 Ithomiini in terms of the male and female genitalia, wing venation and androconia, immature stage  
327 morphology and biology, this variation proved remarkably unhelpful in resolving the phylogeny, perhaps  
328 due to high rates of morphological character evolution. The combination of morphological and molecular  
329 characters obviously increased the resolution of the phylogeny compared to morphology alone, but many  
330 clades were still surprisingly poorly supported, and in any case the phylogeny of *Pteronymia* was less  
331 resolved than those of other ithomiine genera<sup>6,27,49,50</sup>, even when considering only molecular characters.  
332 This may be due to incomplete lineage sorting, rapid diversification or hybridization. While hybridization  
333 and introgression seem common in other mimetic butterflies, such as *Heliconius*<sup>51-53</sup>, nothing is known  
334 about such processes in ithomiine butterflies. Future genomic data may shed light on demographic  
335 processes and gene flow between species, which may have contributed to the poor support seen in some  
336 nodes in the *Pteronymia* phylogeny.

337 Our calibration strategy, based on a combination of secondary calibration derived from host-plant  
338 and Nymphalidae phylogenies, required the recalibration of a published Solanaceae phylogeny<sup>42</sup> (host-  
339 plants of most Ithomiini) because original ages were biased toward present, which precludes using those  
340 data as maximum calibrations. Our new calibration scheme, based on a secondary calibration extracted  
341 from a fossil-dated phylogeny of Angiosperms<sup>43</sup>, inferred ages of Solanaceae lineages that were about  
342 25% older than previous estimates<sup>42</sup>, but mostly within the 95% confidence range of those estimates. The  
343 host-plant ages used in this study as maximum constraints are based on one of the ‘youngest’ hypothesis  
344 for Angiosperm diversification and recent studies suggest older ages of Solanaceae. A phylogenetic  
345 inference using genomic data found a much older origin of Angiosperms<sup>54</sup>, but this had a moderate  
346 impact on the stem age of the order containing Solanaceae (Solanales: ca. 92 mya<sup>54</sup> versus 85.9 mya<sup>43</sup>,  
347 with overlapping 95% confidence ranges<sup>54</sup>) and presumably on that of Solanaceae (not inferred in that  
348 study). The recent description of a 52.2 my old *Physalis* fossil<sup>55</sup>, a solanaceous genus that is inferred to be  
349 9.1 [5.9 – 12.9] my old in our study (stem age), is much more challenging for the ages of Solanaceae and  
350 Angiosperms as a whole. It is possible that this recently described *Physalis* fossil represents an earlier  
351 lineage of Solanaceae. The inflated calyx is found in many genera throughout the ‘berry’ clade of  
352 Solanaceae (i. e., the subfamily Solanoideae, where the stem is the MRCA of *Nicotiana* and *Solanum*  
353 and the crown the MRCA of *Latua* and *Solanum*<sup>56</sup>) and transcription factors governing this character

354 appear to be plesiomorphic in the family<sup>57-59</sup>. Placement of the fossil at an earlier diverging node, such as  
355 that of the berry clade, within Solanaceae is less contradictory in terms of Angiosperm evolution as a  
356 whole, and would not have a major effect in pushing back the stem and crown node age of Solanaceae. In  
357 terms of our findings here, older Solanaceae age estimates does not affect our time-calibrated *Pteronymia*  
358 tree given that butterfly clades appear to be much younger than their corresponding host-plant groups  
359 even when host-plant ages were inferred from one of the 'youngest' Angiosperm time-calibrated  
360 phylogenies<sup>43</sup>.

361 Our combined calibration strategy therefore resulted in ages that were consistent with those inferred  
362 in the Nymphalidae phylogeny<sup>38</sup>, but older than those inferred in the higher-level Ithomiini phylogeny<sup>37</sup>.  
363 This difference stems from several factors. The new ages of the Solanaceae lineages (this paper) used as  
364 maximum calibration were 25% older than the previous estimates used in the higher-level Ithomiini  
365 phylogeny<sup>37</sup>, and we used the oldest boundary of the 95% credibility interval as the (hard) maximum age  
366 of corresponding ithomiine lineages, instead of the mean as in the higher-level Ithomiini phylogeny<sup>37</sup>.  
367 The rationale for this is that minimum (such as fossil-based) and maximum (such as host-plant-based)  
368 calibrations ought to be conservative and therefore account for uncertainty in calibration age<sup>60</sup>. In our  
369 case, where we implemented conservative uniform priors between maximum ages and present, node ages  
370 in the *Pteronymia* phylogeny were not necessarily attracted towards maximum ages, they were just  
371 allowed to go as far as those ages. Since host-plant ages provide maximum calibrations, they need to be  
372 combined with minimum calibrations, in a way similar to fossil-based minimum calibrations that need to  
373 be combined with at least one maximum calibration point<sup>60</sup>. Given the absence of fossils for Danainae,  
374 here we supplemented the host-plant-derived calibrations with secondary calibrations extracted from the  
375 Nymphalidae phylogeny<sup>38</sup>, which was calibrated with a combination of fossils and host-plant constraints.  
376 These calibrations provided both minimum and maximum ages, and therefore imposed a stronger prior on  
377 ithomiine ages than the host-plant-derived calibrations, but to be as conservative as possible we used a  
378 uniform prior spanning the 95% credibility interval of the Nymphalidae ages that were used for  
379 calibration.

380 Our results based on the biogeographic reconstruction of the genus *Pteronymia* and evolution of  
381 elevational range were consistent across trees of the posterior distribution despite the relatively poor  
382 resolution of the MCC phylogeny, and revealed the fundamental roles played by the Northern Andes in  
383 the diversification of the group, in multiple ways. The Northern Andes have probably been (1) the area of  
384 origin of the group (although the inference for the root is not well resolved, this region appears in all the  
385 potential ancestral areas); (2) the centre of early and sustained local diversification; and (3) a source of  
386 recent colonizations to lowland areas and to Central America, that led to an accelerated evolution of the  
387 elevational range.

388 The biogeographical pattern of diversification, where the Andes play a central role, resembles those  
389 found in other Andean ithomiine genera, such as *Hypomenitis*<sup>34</sup>, and to a lesser extent *Napeogenes*<sup>6</sup> and a  
390 clade of *Oleria*<sup>4</sup>. These groups originated and diversified in the Northern Andes during the last 10 million  
391 years, a period during which the Northern Andes experienced different phases of intense uplift<sup>9</sup>. This  
392 period of orogeny involved great landscape transformations that may have affected the dynamics of  
393 Andean lineages, by isolating populations within deep valleys or on both sides of the Andes, but also in  
394 modifying the climatic conditions. Also, the slopes of the Andes offer a great number of opportunities for  
395 ecological speciation due to significant environmental turnover resulting in high habitat, host-plant and  
396 predator diversity. In the genus *Pteronymia*, the observed decrease of speciation rate with time and the  
397 low support for basal nodes may indicate a rapid diversification driven by adaptive factors. Elevations up  
398 to 2000m probably already existed by 10 million years ago in the Northern Andes<sup>61</sup>. Given the timing of  
399 diversification of the genera *Hypomenitis*, *Napeogenes* and *Pteronymia* in the last 15 to 5 million years,  
400 the majority of speciation events have likely not coincided with the appearance of newly available  
401 elevations. Instead, speciation was probably facilitated by an already well-established and diverse  
402 ecosystem. The slopes of the Andes harbour not only a diversity of habitats and host-plant  
403 communities<sup>62,63</sup>, but also a diversity of mimicry rings<sup>27</sup>. *Pteronymia* is one of the most diverse ithomiine  
404 genera in terms of mimetic wing colour patterns. Shifts in colour pattern are known to drive speciation in  
405 other mimetic butterflies such as *Heliconius*<sup>64,65</sup>, where colour pattern is considered as a ‘magic’ trait, i.  
406 e., a trait that is both under disruptive selection and associated with assortative mating<sup>64,66,67</sup>. Mimetic  
407 butterflies often harbour multiple geographic races with different colour patterns, and it has been shown  
408 in *Heliconius* butterflies that interracial hybrids that display an intermediate, non-mimetic colour pattern  
409 suffer higher predation<sup>65</sup>. Shifts in colour pattern may therefore cause postzygotic reproductive isolation.  
410 In addition, *Heliconius* butterflies tend to prefer mates with their own colour pattern over conspecifics  
411 with a different colour pattern<sup>64,66,67</sup>, thereby driving prezygotic reproductive isolation. In this case, loci  
412 involved in mate preference and in colour pattern are tightly linked<sup>68</sup>. In Ithomiini, experimental evidence  
413 for the role of colour pattern as a mating cue is absent due to the difficulty of maintaining and rearing  
414 Ithomiini in captivity, but observation suggests that this may be the case<sup>69</sup>. Moreover, shifts in colour  
415 patterns have been shown to be statistically associated with cladogenesis in phylogenies<sup>35,70</sup>, consistent  
416 with a role of colour pattern in reproductive isolation. Shifts in colour pattern may therefore have  
417 contributed to Andean diversification in the genus *Pteronymia*.

418 In contrast with other ithomiine clades<sup>4,6,34</sup>, little local diversification in *Pteronymia* occurred outside  
419 of the Northern Andes. An exception to this is the *P. vestilla* clade, which expanded into and partly  
420 diversified in lowland areas. According to our reconstructions, this lineage dispersed into the Upper  
421 Amazon from the Northern Andes and started diversifying locally around 5.6 mya [4.8 – 6.7]. Local

422 diversification was then followed by expansions or dispersal into other areas, including the lower  
423 Amazon and Guiana shield, the Atlantic forest, and Western lowlands of Colombia and Ecuador. Only  
424 two extant lineages of this clade occur in Amazonia. The Upper Amazon region has experienced  
425 important environmental changes since the Miocene. During most of the Miocene, the region was  
426 covered by the large lake and shallow swamps of the Pebas system, which was connected northward to  
427 the Caribbean Sea and potentially westward to the Pacific Ocean<sup>9</sup>. This particular ecosystem may have  
428 had a major influence on the diversification of clades restricted to forest habitats<sup>14,22</sup> by limiting  
429 occurrence and therefore speciation to the margins of this region, but probably also by preventing  
430 dispersal between Amazonia and the Andes and between the Northern and the Central Andes (via the  
431 West Andean Portal, a low elevation gap between the Northern and Central Andes<sup>71</sup>). The demise of the  
432 Pebas system started around 10-8 mya and it was rapidly drained eastward, leading to the establishment  
433 of the modern Amazon basin, probably around 7 mya<sup>9</sup>. Our results suggest that dispersal and  
434 diversification in Amazonia did not occur simultaneously with the drainage of Pebas, but later on. The  
435 diversification of the *P. vestilla* clade in the Upper Amazon occurred fairly recently (5.6 mya [4.8 – 6.7]),  
436 as did the independent colonizations of the Upper Amazon by the ancestor of *P. veia*\_WEST and *P.*  
437 *tucuna* (1.5 mya [0.9 -2.2]), and the ancestor of *P. sao* and *P. obscuratus* (2.7 mya [1.8 – 3.6]). The  
438 timing of the colonization of the Upper Amazon by *P. forsteri*, which split from its sister clade 8.3 mya  
439 [6.8 -10], is much less precise, since it could have happened any time during this period.

440 Because little local diversification in *Pteronymia* occurred outside of the Northern Andes, most of  
441 the diversity in non-Andean regions is due to colonization out of the Andes. Species diversity in the  
442 Central Andes and Central America built up through the accumulation of independent dispersal events,  
443 rarely followed by speciation events. Many of these events occurred without strong elevational shifts  
444 suggesting that dispersal may have been facilitated by the existence of similar ecological conditions in  
445 montane areas. By contrast, dispersal toward lowland areas, such as the Upper Amazon, may have  
446 entailed more adaptations to fit different bioclimatic conditions or host-plants, which likely explains the  
447 rare occurrence of such events.

448 There is a debate surrounding the timing of the closure of the Panama Isthmus. The hypothesis  
449 that it occurred very recently (5-3 mya) has been widely adopted in the literature (see<sup>12</sup>. However, both  
450 geological and paleontological findings suggest a possible much earlier appearance of land masses,  
451 possibly as early as the early or middle Miocene (e.g.<sup>12,72-74</sup>. In our biogeographical analysis, although  
452 interchanges between Central America and South America were allowed earlier, most of the colonization  
453 events of *Pteronymia* lineages toward Central America have occurred during the last 5.0 [4.0 – 5.9]  
454 million years, in agreement with the first hypothesis. However, the colonization time of Central America

455 by *P. fumida* and *P. spnov* 4, two species with long branches, is uncertain, and may have happened much  
456 earlier.

457 The pattern of diversification inferred for *Pteronymia* is very similar to biogeographic patterns of  
458 other taxa described in the literature. For example, in vertebrates, the Northern Andes were a major centre  
459 of diversification for glassfrogs (Allocentroleniinae), which subsequently fed the adjacent areas through  
460 dispersal, including the Central Andes and the non-Andean regions<sup>3</sup>. A similar conclusion was reached in  
461 the Thraupini tanagers, which also diversified during the last 10 million years, with higher rates of  
462 colonization out of the Northern Andes (mostly toward the Central-Andes) rather than into that region<sup>75</sup>.  
463 The bat genus *Sturnina* also diversified during the last 10 million years, from the Northern Andes toward  
464 the rest of the Neotropical region<sup>76</sup>. Similarly, in plants, many studies report the Northern Andes as a  
465 centre of diversification and a source for adjacent areas<sup>23</sup>. The Rubiaceae subfamily Cinchonoideae  
466 originated and mostly diversified in the Northern Andes, with subsequent colonization of both lowland  
467 and highland adjacent areas<sup>71</sup>. Extremely high rates of diversification were reported in the Andes for the  
468 genus *Lupinus*<sup>7</sup>. The Campanulaceae experienced higher rates of diversification in the Andes that were  
469 correlated with paleoelevations of the Andes<sup>8</sup>, suggesting that the Andes have directly affected  
470 diversification in this family. Taken together, these findings are consistent with the idea that, at least  
471 during the last 10 million years, the Northern Andes have been an important source of biodiversity in the  
472 Neotropics probably due to geological, climatic and biotic factors, with local diversification followed by  
473 lineage dispersal throughout other Neotropical regions.

474

## 475 **Methods**

### 476 *Morphological characters and phylogeny*

477 Prior to our study, 47 species were listed in the genus *Pteronymia*, but this figure increased to 53 after  
478 taxonomic revision based on new data (Table 1). Forty-six adult and 41 immature (i.e., larval and pupal)  
479 morphological characters were examined in 52 *Pteronymia* species (after our revision, see Supplementary  
480 Methods S1, Supplementary Table S2, Supplementary Figs. S8-S9 online; *P. dispar* **rev. stat.** was not  
481 coded) and two outgroup species (*Episcada apuleia* and *Dircennina adina*).

482 A Maximum Parsimony topology was estimated in TNT v. 1.5-beta<sup>77</sup> using the New Technology  
483 Search, with all four search methods – ratchet, tree-fusing, tree-drifting and sectorial, with default  
484 parameters, 100 random additional sequences and random seed equal 0, with all characters equally  
485 weighted. The majority-rule consensus tree, consistency index (CI) and the retention index (RI) were  
486 computed in Winclada<sup>78</sup>. The stability of each branch was estimated using the non-parametric bootstrap  
487 test, with 1,000 replicates and 100 random taxon additions, and Bremer support, using the script  
488 Bremer.run in TNT.

489

## 490 *Molecular characters and phylogeny*

491 We used a total of 166 *Pteronymia* specimens for molecular analyses, representing 41 of the species  
492 recognized prior to our revision, and 47 of the species recognized after our revision (Table 1; see  
493 Supplementary Table S1 online). Species with no molecular data were *P. alcmena*, *P. alicia*, *P. calgria*,  
494 *P. fumida*, *P. glauca* and *P. peteri*.

495 We used *de novo* (ca. 85%) and published (ca. 15%) sequences from five gene regions to infer a  
496 molecular phylogeny (see Supplementary Table S1 online): the mitochondrial region spanning the  
497 mitochondrial genes *cytochrome oxidase c subunit 1*, *leucine transfer RNA* and *cytochrome oxidase c*  
498 *subunit 2* (CO1, tRNA<sup>Leu</sup>, CO2, 2356 bp), and the nuclear genes *tektin* (735 bp) and *Elongation Factor 1*  
499 *alpha* (EF1A, 1259 bp). Species coverage was 98% for the mitochondrial fragment, 73% for *tektin* and  
500 63% for EF1A. Primers and PCR conditions followed previously described conditions<sup>6</sup>. In addition, 52  
501 ithomiine and danaine outgroup species were selected<sup>34</sup> (see Supplementary Table S1 online). The dataset  
502 was then partitioned by gene and codon positions and the best models of substitution for optimized sets of  
503 nucleotides were selected over all models implemented in (1) RAxML<sup>79</sup> and (2) MrBayes<sup>80</sup>, using the  
504 ‘greedy’ algorithm and linked rates implemented in PartitionFinder 1.1.1<sup>81</sup> (see Supplementary Table S3  
505 online).

506 We performed a maximum likelihood phylogenetic inference using RAxML<sup>79</sup> on the Cipres server<sup>82</sup>.  
507 In addition, we performed a Bayesian inference of the phylogeny using MrBayes 3.2.2<sup>80</sup> on the Cipres  
508 server<sup>82</sup>. Substitution models of each partition were re-estimated in MrBayes 3.2.2 using the reversible-  
509 jump MCMC<sup>83</sup>. Two independent analyses were run for 10 million generations, with four Monte Carlo  
510 Markov chains each and a sampling frequency of one out of 10,000 generations (resulting in 1,000  
511 posterior trees). After checking for convergence, the posterior distributions of the two runs were  
512 combined, with a burnin of 10%. The maximum clade credibility tree with median node ages was  
513 computed using TreeAnnotator 1.6.2<sup>44</sup>. The resulting tree was used to investigate topology and species  
514 boundaries.

515

## 516 *Molecular dating*

517 In order to estimate a time-calibrated phylogeny of *Pteronymia*, we combined two types of time  
518 constraints: the age of larval host-plants and age estimates from higher-level phylogenies of butterflies.  
519 Host-plant ages can be used as maximum age constraints in phylogenies of mono- or oligophagous  
520 herbivores<sup>37,38</sup>, assuming that such herbivorous taxa diversified only after the emergence of their host-  
521 plant lineages. Most Ithomiini feed on Solanaceae, which represents a host-plant shift from the ancestral  
522 host-plants of Danainae (Apocynaceae<sup>84</sup>). In a previous study aiming at dating a higher-level phylogeny



523 of the tribe Ithomiini<sup>37</sup>, ages of several Solanaceae lineages inferred from a dated phylogeny of  
524 Solanaceae<sup>42</sup> were used as maximum calibrations for Ithomiini clades feeding on specific Solanaceae  
525 lineages. The ages of clades in the Solanaceae phylogeny<sup>42</sup> were minimum age estimates because  
526 Solanaceae fossils known at that time were placed conservatively at the stem ages of lineages with which  
527 they shared morphological synapomorphies, and because fossils in general can only provide minimum  
528 age estimates for clades. Therefore, using those minimum Solanaceae ages as maximum calibrations for  
529 Ithomiini lineages may strongly underestimate the ages of the butterfly lineages, especially when using  
530 mean or median age estimates instead of older bounds. Here, we took advantage of a recent calibration of  
531 the family-level phylogeny of the angiosperms based on 151 fossils<sup>43</sup> to recalibrate the Solanaceae  
532 phylogeny using the inferred stem age of Solanaceae, i.e., 66.6 mya, as a calibration point in a Bayesian  
533 framework (Supplementary Methods S1.2). Due to the recent description of a 52.2 my old Solanaceae  
534 fossil placed in the extant genus *Physalis*<sup>55</sup> that could have dramatic consequences on the age estimates of  
535 Solanaceae and Angiosperms as a whole, we also ran an analysis without calibration based on host-plant  
536 ages. Indeed, much older ages of Solanaceae lineages as those implied by this discovery would have  
537 hardly any impact on the ages of Ithomiini, and removing host-plant derived calibrations is therefore a  
538 conservative way of testing the influence of older host-plant ages. Since the two calibration strategies  
539 yielded almost the same ages (see results) we performed the biogeographic and diversification analyses  
540 on the tree calibrated using the combined calibration strategy detailed below. For further discussion on  
541 the recently described Solanaceae fossil and its potential effect on host plant age estimates, see  
542 Discussion above.

543 We extracted the new maximum ages of several Solanaceae lineages from our newly calibrated  
544 phylogeny in order to provide maximum calibrations for Ithomiini lineages that feed on them<sup>84</sup>. The  
545 choice of the host-plant calibrations (Fig. 1) followed that of the genus-level Ithomiini phylogeny study<sup>37</sup>,  
546 with the following exceptions. We excluded the *Solanum* calibration, because the two lineages feeding  
547 exclusively on *Solanum* (the Mechanitina and the clade comprising the Oleriina, Dircennina, Godyridina,  
548 Ithomiina and Napeogeneina) do not have a sister relationship in our and in other Ithomiini  
549 phylogenies<sup>27,34</sup>. We also excluded the *Cestrum* calibration (ithomiine subtribe Godyridina, excluding the  
550 genera *Veladyris* and *Velamysta*) because this highly diverse genus had a low sampling fraction of 20%  
551 in the Solanaceae phylogeny and was not resolved as monophyletic<sup>42</sup>. Finally, for simplicity we excluded  
552 the calibrations based on Solanaceae genera *Brunfelsia* and *Lycianthes*, because they apply to young  
553 butterfly lineages (the subtribe Methonina and the clade comprising the genera *Oleria* and *Ollantaya*,  
554 respectively<sup>37,38</sup>) and would have no effect on the age estimates. A uniform prior was used for host-plant-  
555 derived calibrations. The upper boundary of the prior was set to the upper boundary of the 95%

556 credibility interval of the age of the host-plant lineage and the lower boundary of the prior was set to 0  
557 (present) (Fig. 1).

558 As a second source of calibration points we used age estimates from Wahlberg *et al.*'s<sup>38</sup> dated  
559 Nymphalidae phylogeny. We defined seven secondary calibrations points which were set to a uniform  
560 prior bounded by the upper and lower boundaries of the 95% HPD of the ages inferred in the  
561 Nymphalidae phylogeny<sup>38</sup> (Fig. 1).

562 Sequences of all *Pteronymia* specimens were combined into a consensus sequence for each species to  
563 maximize sequence coverage for each species<sup>34</sup>. We used PartitionFinder 1.1.1<sup>81</sup> to select the best  
564 partition scheme applying to this new dataset, where only the models implemented in BEAST were tested  
565 (see Supplementary Table S5 online). A time-tree was generated in BEAST 1.7.5<sup>44</sup> under an uncorrelated  
566 lognormal relaxed clock using the same outgroups as previously, and the dating procedure described  
567 above. To select the tree prior (Yule versus Birth-Death), we ran analyses with each type of prior and  
568 used Stepping Stone sampling<sup>85</sup> to estimate marginal likelihood (MLE). This method is not implemented  
569 in BEAST 1.7.5, thus we performed this analysis on BEAST 1.8.2 on the molecular dataset only (BEAST  
570 1.8.2 cannot handle morphological characters). The MLE were then used to compute Bayes Factors (BF),  
571 which supported the Yule model (BF=4.44). We also ran analyses on the total evidence on BEAST 1.7.5  
572 under the Yule and the Birth-Death model to compare age estimates. Both types of analyses yielded  
573 virtually identical ages (regression of ages under Birth-Death (BD) on ages under Yule (Y):  $BD =$   
574  $0.9985*Y$ ,  $r^2=0.999$ ). Analyses with and without morphological data also produced very similar ages  
575 (regression of ages with molecular data only (M) on ages with the combined evidence (C):  $M =$   
576  $0.9892*C$ ,  $r^2=0.997$ ). Analyses were run for 100 million generations each on the Cipres server<sup>82</sup> and on a  
577 desktop computer depending on the version of BEAST, and trees and parameters were sampled every  
578 100,000 generation. After checking for parameter ESS, a 10% burnin was applied to the posterior  
579 distribution and the maximum clade credibility tree with median node ages (hereafter, MCC tree) was  
580 computed using TreeAnnotator 1.6.2<sup>44</sup>. Given the results on the tree prior (Yule versus Birth-Death, see  
581 above), subsequent analyses were performed on the trees generated under a Yule prior. Because many  
582 nodes of the phylogeny had moderate or poor support, we conducted most of the analyses outlined below  
583 on the MCC tree and on a random subset of 100 trees extracted from the post burnin posterior distribution  
584 of trees obtained from the BEAST run.

585

### 586 *Spatial patterns of diversification*

587 Geographic distribution and elevational range for all extant species were obtained from our own  
588 records, museum collections and collaborators (Table 1, Supplementary Fig. S5). The biogeographic  
589 history of *Pteronymia* was estimated using the Maximum Likelihood Dispersal-Extinction-Cladogenesis

590 (DEC) model<sup>86</sup> on the MCC tree, and its extension for multiple trees (Statistical DEC, or S-DEC) on the  
591 100 trees extracted from the posterior distribution, using the software RASP 2.1<sup>45</sup>. We defined nine  
592 biogeographical areas (Fig. 2): Central America (A), Western lowlands (B), Slopes of the  
593 Western/Central Cordillera of Ecuador and Colombia (C), Central Andes (D), Slopes of the Eastern  
594 Cordillera of Colombia and Venezuela (E), Upper Amazon (F), Lower Amazon (G), Atlantic Forest (H),  
595 and Guiana Shield (I), and the maximum number of ancestral areas in our analyses was set to four  
596 reflecting the maximum number of areas occupied by extant species. We implemented three time slices  
597 (11-8, 8-5, 5-0 million years ago, Fig. 1) with different dispersal probabilities, which took into  
598 consideration major geological events through time<sup>9</sup>.

599

#### 600 *Ancestral state reconstruction and evolution of elevational range*

601 Elevational range (elevation range, i.e., boundaries of the elevational interval containing 95% of the  
602 records and mean elevation) for all extant species were extracted from the distributional database  
603 computed above (Table 1). Evolution of elevational range was investigated on both the MCC tree and the  
604 subset of 100 trees as follows. The phylogenetic signal and the tempo of evolution of the mean elevation  
605 and the boundaries of the elevational range were assessed by estimating simultaneously the values of the  
606  $\lambda$  and  $\delta$  scaling parameters<sup>46</sup> that maximized the likelihood of the data using BayesTraits v2<sup>87</sup>. A  $\lambda$  value  
607 of one indicates that the phylogeny correctly represents the trait covariance among species, while a value  
608 of 0 indicates that the trait evolution is independent of the phylogeny. A value of  $\lambda$  smaller than one  
609 indicates that the phylogeny overestimates the trait covariance among species. A  $\delta$  value of one means  
610 that the trait evolves at a constant pace along the branches of the tree;  $\delta < 1$  indicates early changes in the  
611 character values followed by a slowing down of the evolution rate, such as that entailed by an adaptive  
612 radiation; while  $\delta > 1$  indicates accelerated evolution rate and species-specific adaptation. The MCC tree  
613 was then rescaled with the corresponding  $\delta$  and  $\lambda$  values inferred for the mean elevation and the upper  
614 and lower boundaries of elevational range, when those differed from 1, such that the evolutionary rate of  
615 the elevation attributes on the transformed tree was constant. The resulting trees were used to infer  
616 ancestral values of the attributes (assuming a constant evolution rate), using the function *contMap* of the  
617 R package *phytools*<sup>88</sup>.

618

#### 619 *Temporal patterns of diversification*

620 To investigate the pattern of speciation and extinction rate variations through time and across lineages, we  
621 chose not to use BAMM 2.5.0<sup>89</sup> because of recent criticisms on uninformative priors and biased estimates  
622 of diversification rates<sup>90</sup>. Instead, we implemented a two-step procedure. We first used MEDUSA<sup>47</sup>  
623 implemented in the R package *geiger*<sup>91</sup> to detect shifts on the selection of 100 random trees of the posterior

624 distribution, and on the MCC tree. MEDUSA has also been criticised because of its inflated false discovery  
625 rate and biased estimates of diversification rates<sup>92</sup>. To overcome these shortcomings and to implement time-  
626 dependent models of diversification, we used the method developed by Morlon et al. (2011)<sup>48</sup>, a maximum  
627 likelihood approach that accommodates time dependent birth-death processes and enables to test for rate  
628 shifts. We used as a rule that if a shift was present in at least 5% of the trees of the posterior distribution in  
629 the MEDUSA analysis, this shift was tested with Morlon et al.(2011)'s method<sup>48</sup>. Shifts detected in less  
630 than 5% of the posterior distribution were considered non-significant and not tested with Morlon et al.  
631 (2011)'s method<sup>48</sup>. We fitted 6 models of diversification<sup>48</sup>: constant speciation without extinction, time-  
632 dependent speciation without extinction, constant speciation with constant extinction, time-dependent  
633 speciation and constant extinction, constant speciation and time-dependent extinction, time-dependent  
634 speciation and time-dependent extinction. Time-dependency was modelled using an exponential function.  
635 Models were compared using AIC scores. The root of the tree was always excluded from the analyses. Our  
636 phylogeny included all known species so we set the sampling fraction to 1. All models were fitted on the  
637 MCC tree and on the 100 trees sampled from the posterior distribution.

638

## 639 **References**

## 640 **Acknowledgements**

641 We thank authorities of Peru, Ecuador, Colombia, Panama and Brazil (ICMBio, SISBIO no. 10802-5) for  
642 issuing research and collection permits, as well as many assistants for their help in the field and in  
643 curating and databasing museum specimens . We are grateful to Haydon Warren-Gash and Niklas  
644 Wahlberg for providing specimens. We thank Christine Bacon and Fabien Condamine for providing  
645 constructive comments on this manuscript. ME acknowledges financial support from CNRS (France) and  
646 the Leverhulme trust (UK). LDS's postdoc was funded by an ATIP (CNRS, France) grant awarded to  
647 ME. NC was funded by a doctoral grant from the Doctoral School 227 (Sciences de la Nature et de  
648 l'Homme: Evolution et Ecologie, France). KW acknowledges funding from NSF (DEB-0639861, DEB-  
649 0103746), the National Geographic Society, the Darwin Initiative and the Leverhulme Trust. A.V.L.F.  
650 thanks CNPq (fellowships 302585/2011-7 and 303834/2015-3), RedeLep-SISBIOTA-Brasil/CNPq  
651 (563332/2010-7), BR-BoL (MCT/CNPq/FNDCT 50/2010) and FAPESP (BIOTA-FAPESP Programs  
652 2011/50225-3, 2012/50260-6 and 2013/50297-0). KLSB acknowledges support by FAPESP  
653 (2012/16266-6). Support for components of this work was provided through a collaborative grant,  
654 Dimensions US-Biota-São Paulo, supported by the US National Science Foundation (NSF DEB  
655 1241056), National Aeronautics and Space Administration (NASA), and the Fundação de Amparo à  
656 Pesquisa do Estado de São Paulo (FAPESP Grant 2012/50260-6). Molecular work was performed at the  
657 GenePool (University of Edinburgh, UK), UCL (UK) and the Service of Molecular Systematics

658 UMS2700 of the MNHN (France). Work by SK and TS to construct the original Solanaceae phylogeny  
659 was funded by the National Science Foundation (DEB-0316614).

660

#### 661 **Author Contributions**

662 D.L.D.S., L.L.M., N.C., K.R.W. and M.E. conceived the study, with contributions from A.V.L.F., G.L.,  
663 T.S., S.K. and C.D.J. D.L.D.S., N.C., R.M., K.L.S-B., L.M.G.P., A.V.L.F., G.L., M.J., J.M., C.E.G.,  
664 S.U., C.D.J., K.R.W. and M.E. provided *Pteronymia* specimens and sequences. L.L.M., A.V.L.F. and  
665 K.R.W. generated the morphological dataset. T.S. and S.K. provided the Solanaceae dataset. D.L.D.S.,  
666 N.C., K.L.S-B. and M.E. performed the analyses. D.L.D.S., N.C., K.R.W. and M.E. wrote the paper,  
667 with contributions from all co-authors.

668

#### 669 **Additional Information**

##### 670 **Supplementary information**

671 Accompanies this paper at <http://www.nature.com/srep>

672

##### 673 **Competing financial interests:**

674 The authors declare no competing financial interests.

675 Table 1. List of the species in the genus *Pteronymia*, including revised status. Availability of molecular  
 676 and morphological data, distribution area and elevation mean and 95% range are reported for each  
 677 species.

| <i>Pteronymia</i> species              | Previous name | Molecular data | Morphological data | Biogeographical area | Mean elevation [95% range] (m) |
|----------------------------------------|---------------|----------------|--------------------|----------------------|--------------------------------|
| <i>Pteronymia alcmena</i>              |               |                | x                  | A                    | 1100 [1050 - 1200]             |
| <i>Pteronymia aletta</i>               |               | x              | x                  | ABCE                 | 693 [50 - 1450]                |
| <i>Pteronymia alicia</i>               |               |                | x                  | I                    | 1235 [1100 - 1490]             |
| <i>Pteronymia alida</i>                |               | x              | x                  | CDE                  | 1933 [800 - 3000]              |
| <i>Pteronymia andreas</i> (rev. stat.) | <i>alissa</i> | x              | x                  | CDI                  | 1337 [750 - 1860]              |
| <i>Pteronymia alissa</i>               |               | x              | x                  | CE                   | 1227 [300 - 2000]              |
| <i>Pteronymia artena</i>               |               | x              | x                  | ACDE                 | 1365 [900 - 2060]              |
| <i>Pteronymia calgiria</i>             |               |                | x                  | D                    | 1719 [1300 - 2970]             |
| <i>Pteronymia carlia</i>               |               | x              | x                  | H                    | 910 [100 - 1700]               |
| <i>Pteronymia cotytto</i>              |               | x              | x                  | AE                   | 776 [80 - 1455]                |
| <i>Pteronymia donella</i>              |               | x              | x                  | AB                   | 386 [20 - 825]                 |
| <i>Pteronymia euritea</i>              |               | x              | x                  | H                    | 553 [30 - 1250]                |
| <i>Pteronymia forsteri</i>             |               | x              | x                  | F                    | 632 [182 - 1350]               |
| <i>Pteronymia fulvimargo</i>           |               | x              | x                  | A                    | 1455 [1110 - 2060]             |
| <i>Pteronymia fumida</i>               |               |                | x                  | AC                   | 870 [450 - 1000]               |
| <i>Pteronymia gertschi</i>             |               | x              | x                  | C                    | 950 [500 - 1000]               |
| <i>Pteronymia glauca</i>               |               |                | x                  | C                    | 1230 [800 - 1400]              |
| <i>Pteronymia granica</i>              |               | x              | x                  | C                    | 1929 [1500 - 2250]             |
| <i>Pteronymia hara</i>                 |               | x              | x                  | ACDE                 | 1474 [600 - 2400]              |
| <i>Pteronymia inania</i>               |               | x              | x                  | CE                   | 1659 [1200 - 2100]             |
| <i>Pteronymia latilla</i>              |               | x              | x                  | ACE                  | 1012 [170 - 1925]              |
| <i>Pteronymia laura</i>                |               | x              | x                  | CE                   | 1088 [800 - 1400]              |
| <i>Pteronymia lonera</i>               |               | x              | x                  | A                    | 1198 [500 - 1575]              |
| <i>Pteronymia medellina</i>            |               | x              | x                  | C                    | 1707 [1380 - 2000]             |
| <i>Pteronymia obscuratus</i>           |               | x              | x                  | AB                   | 257 [30 - 700]                 |
| <i>Pteronymia olimba</i>               |               | x              | x                  | D                    | 1403 [1000 - 1525]             |
| <i>Pteronymia oneida</i>               |               | x              | x                  | CE                   | 1992 [1250 - 2650]             |
| <i>Pteronymia asopo</i> (rev. stat.)   | <i>oneida</i> | x              | x                  | E                    | 900 [900 - 900]                |
| <i>Pteronymia ozia</i>                 |               | x              | x                  | CDE                  | 1446 [600 - 2500]              |
| <i>Pteronymia parva</i>                |               | x              | x                  | A                    | 842 [200 - 2060]               |
| <i>Pteronymia peteri</i>               |               |                | x                  | I                    | 1040 [1040 - 1040]             |
| <i>Pteronymia picta</i>                |               | x              | x                  | ACE                  | 1104 [350 - 2060]              |
| <i>Pteronymia dispar</i> (rev. stat.)  | <i>picta</i>  | x              |                    | C                    | 1500 [1300 - 1800]             |
| <i>Pteronymia primula</i>              |               | x              | x                  | BFG                  | 389 [65 - 1050]                |
| <i>Pteronymia rufocincta</i>           |               | x              | x                  | A                    | 998 [210 - 1500]               |
| <i>Pteronymia sao</i>                  |               | x              | x                  | FG                   | 332 [100 - 800]                |
| <i>Pteronymia serrata</i>              |               | x              | x                  | CD                   | 2091 [1700 - 2300]             |
| <i>Pteronymia sexpunctata</i>          |               | x              | x                  | D                    | 1265 [635 - 1500]              |
| <i>Pteronymia simplex</i>              |               | x              | x                  | A                    | 1544 [1100 - 2300]             |

|                                        |                 |   |   |     |                    |
|----------------------------------------|-----------------|---|---|-----|--------------------|
| <i>Pteronymia tamina</i>               |                 | x | x | CD  | 1667 [800 - 2075]  |
| <i>Pteronymia thabena</i> (rev. stat.) | <i>teresita</i> | x | x | CDE | 1670 [790 - 2400]  |
| <i>Pteronymia teresita</i>             |                 | x | x | C   | 1184 [1000 - 1350] |
| <i>Pteronymia ticida</i>               |                 | x | x | CDE | 1784 [1200 - 2400] |
| <i>Pteronymia tucuna</i>               |                 | x | x | F   | 777 [100 - 1350]   |
| <i>Pteronymia veia</i> _EAST           | <i>veia</i>     | x | x | CE  | 1662 [1000 - 2400] |
| <i>Pteronymia veia</i> _WEST           | <i>veia</i>     | x | x | C   | 1729 [1300 - 2150] |
| <i>Pteronymia vestilla</i>             |                 | x | x | F   | 398 [100 - 900]    |
| <i>Pteronymia alina</i> (rev. stat.)   | <i>zerlina</i>  | x | x | CD  | 1784 [700 - 2500]  |
| <i>Pteronymia zerlina</i>              |                 | x | x | CE  | 1473 [635 - 2000]  |
| <i>Pteronymia spnov 1</i>              |                 | x | x | E   | 1730 [1730 - 1730] |
| <i>Pteronymia spnov 2</i>              |                 | x | x | C   | 1765 [850 - 2530]  |
| <i>Pteronymia spnov 3</i>              |                 | x | x | C   | 1898 [1700 - 2030] |
| <i>Pteronymia spnov 4</i>              |                 | x | x | A   | 656 [500 - 700]    |

678

679 Table 2. Comparison of our estimates of ages of Solanaceae lineages with those of Särkinen et al.  
680 (2013)<sup>42</sup>. \*ages used as calibration in the *Pteronymia* phylogeny.

681

| Solanaceae clades                                                    | Age estimates<br>This study | Age estimates<br>Särkinen et al. (2013) |
|----------------------------------------------------------------------|-----------------------------|-----------------------------------------|
| Stem of Solanaceae*                                                  | 64.0 my [48 – 83]           | 49my [46 -54]                           |
| Crown of Solanaceae                                                  | 42.2 my [26.8-55.2]         | 30.3 my [26.3-34.0]                     |
| Crown of “x=12” clade (MRCA <i>Solanum</i><br>and <i>Nicotiana</i> ) | 39.5 my [21.9-44.4]         | 23.7 my [23.0-25.7]                     |
| Crown of <i>Solanum</i>                                              | 20.9 my [14.5-29.5]         | 15.6 my [13.1-17.5]                     |
| Stem of <i>Capsicum</i> *                                            | 19.0 my [11.5 - 25]         | 13 my [10 – 16]                         |
| stem of <i>Schultesianthus</i> *                                     | 17.0 my [7 – 24]            | 13 my [9 – 19]                          |
| stem of <i>Brugmansia</i> *                                          | 10.5 my [5 – 14]            | 7 my [4 – 10]                           |

682

683

684 Table 3. Maximum likelihood estimates of  $\delta$  for the mean and boundaries of the 95% elevational range,  
685 for the 100-tree posterior distribution (average values  $\pm$  standard deviation), and for the MCC tree.

686 Likelihood Ratio Tests values when compared with the null model ( $\delta = 1$ ), corresponding p-values and  
687 fraction of trees for which  $\delta$  is significantly different from 1 are reported.

688

| Trees        |          | Mean<br>Elevation | 95% lower<br>boundary               | 95% upper<br>boundary               |
|--------------|----------|-------------------|-------------------------------------|-------------------------------------|
|              | $\delta$ | 1.85 $\pm$ 0.60   | 2.96 $\pm$ 0.17                     | 2.89 $\pm$ 0.23                     |
| Posterior    | LRT      | 1.36 $\pm$ 1.63   | 5.72 $\pm$ 1.89                     | 5.26 $\pm$ 2.62                     |
| distribution | p-value  | 0.377 $\pm$ 0.250 | <b>0.028 <math>\pm</math> 0.044</b> | <b>0.045 <math>\pm</math> 0.048</b> |

|     |                        |       |              |       |
|-----|------------------------|-------|--------------|-------|
|     | % trees p-value < 0.05 | 4     | 87           | 70    |
| MCC | $\delta$               | 1.55  | 2.99         | 2.86  |
|     | LRT                    | 0.625 | 5.16         | 3.10  |
|     | P-value                | 0.429 | <b>0.023</b> | 0.078 |

689

690 Table 4. Models of time-dependent diversification fitted on 100 trees from the posterior distribution, ranked  
 691 by increasing AIC score. Mean values of parameters are indicated followed by the standard deviation in  
 692 brackets. BCST=constant speciation, BVAR=time-dependent speciation, DCST=constant extinction,  
 693 DVAR time-dependent extinction. logL = likelihood of the model, AIC = AIC score,  $\Delta$ AIC = difference  
 694 of AIC between the each model and the best fitting model,  $\lambda$ =speciation rate at present,  $\alpha$ =coefficient of  
 695 time variation of the speciation rate,  $\mu$ =extinction rate at present,  $\beta$ =coefficient of time variation of the  
 696 extinction rate.

697

| Model       | Par      | logL                             | AIC                             | $\Delta$ AIC | $\lambda$                      | $\alpha$                       | $\mu$                    | $\beta$             |
|-------------|----------|----------------------------------|---------------------------------|--------------|--------------------------------|--------------------------------|--------------------------|---------------------|
| <b>BVAR</b> | <b>2</b> | <b>-122.93</b><br><b>(0.286)</b> | <b>249.86</b><br><b>(0.571)</b> | <b>0.00</b>  | <b>0.161</b><br><b>(0.001)</b> | <b>0.110</b><br><b>(0.003)</b> |                          |                     |
| BVAR - DCST | 3        | -122.93<br>(0.286)               | 251.86<br>(0.571)               | 2.00         | 0.161<br>(0.001)               | 0.110<br>(0.003)               | 5.00E-08<br>(5.00E-08)   |                     |
| BCST        | 1        | -125.39<br>(0.258)               | 252.79<br>(0.516)               | 2.93         | 0.233<br>(0.001)               |                                |                          |                     |
| BVAR - DVAR | 4        | -122.93<br>(0.286)               | 253.86<br>(0.571)               | 4.00         | 0.161<br>(0.001)               | 0.110<br>(0.003)               | 5.00E-08<br>(5.00E-08)   | -0.004<br>(0.003)   |
| BCST - DCST | 2        | -125.39<br>(0.258)               | 254.79<br>(0.516)               | 4.93         | 0.233<br>(0.001)               |                                | <1.00E-08<br>(<1.00E-08) |                     |
| BCST - DVAR | 3        | -125.39<br>(0.258)               | 256.79<br>(0.516)               | 6.93         | 0.233<br>(0.001)               |                                | <1.00E-08<br>(<1.00E-08) | 0.005<br>(2.00E-04) |

698

699

700



701 Figure 1: BEAST dated species-level phylogeny of the genus *Pteronymia*, based on molecular and  
702 morphological characters. Main clades and secondary calibration points based on butterfly (red circles)  
703 and host-plant ages (green circles) are indicated and corresponding age priors are shown in the table  
704 inserted in the figure. The figure was generated with FigTree (<http://tree.bio.ed.ac.uk/software/figtree/>)  
705 and edited with Adobe Illustrator 4 (<http://www.adobe.com/uk/products/illustrator.html>). Butterfly  
706 pictures were taken by Keith Willmott and edited in Adobe Photoshop CS4  
707 ([www.adobe.com/products/photoshop/](http://www.adobe.com/products/photoshop/)).

708  
709 Figure 2: Biogeographical regions used in the DEC and SDEC models for reconstruction of ancestral  
710 areas and the dispersal probability matrices for the different time slices. Species richness in each areas are  
711 shown in the circles. The map was generated using ArcGIS 9.3 (<http://www.edit.com/software/arcgis/>),  
712 and edited with Adobe Illustrator 4 (<http://www.adobe.com/uk/products/illustrator.html>).

713  
714 Figure 3: RASP historical biogeography inference (best maximum likelihood estimates on the MCC tree).  
715 Major paleoenvironmental events are indicated by large coloured rectangle (light pink: drainage of te  
716 Pebas system; light yellow: hypothesized closure of the Isthmus of Panama). The figure was generated  
717 with R (<https://cran.r-project.org/>) and edited with Adobe Illustrator 4  
718 (<http://www.adobe.com/uk/products/illustrator.html>).

719  
720 Figure 4: Ancestral reconstruction of the mean and boundaries of the 95% elevational range (left: lower  
721 boundary, middle: upper boundary, right: mean). For the lower and upper boundaries of the elevational  
722 range, trees were rescaled according to the  $\delta$  value inferred (Table 2). The figure was generated with R  
723 (<https://cran.r-project.org/>).

724  
725 Figure 5. Speciation rate through time estimated by the best fitting model of diversification (Table 4). The  
726 model was fitted on the MCC tree and on 100 trees. The dotted line corresponds to the speciation rate of  
727 the MCC tree. The plain line corresponds to the mean speciation rate according of the 100 trees, and dashed  
728 lines correspond to the 95% confidence interval. The figure was generated with R (<https://cran.r-project.org/>).

## 731 **References**

- 732  
733 1. Myers, N., Mittermeier, R.A., Mittermeier, C.G., da Fonseca, G.A.B. & Kent, J. Biodiversity  
734 hotspots for conservation priorities. *Nature*. **403**, 853-858 (2000).

- 735 2. Beckman, E.J. & Witt, C.C. Phylogeny and biogeography of the New World siskins and  
736 goldfinches: Rapid, recent diversification in the Central Andes. *Mol. Phylogenet. Evol.* **87**, 28-45  
737 (2015).
- 738 3. Castroviejo-Fisher, S., Guayasamin, J.M., Gonzalez-Voyer, A. & Vila, C. Neotropical  
739 diversification seen through glassfrogs. *J. Biogeogr.* **41**, 66-80 (2014).
- 740 4. De-Silva, D.L., Elias, M., Willmott, K., Mallet, J. & Day, J.J. Diversification of clearwing  
741 butterflies with the rise of the Andes. *J. Biogeogr.* **43**, 44-58 (2016).
- 742 5. Ebel, E.R. et al. Rapid diversification associated with ecological specialization in Neotropical  
743 Adelpha butterflies. *Mol. Ecol.* **24**, 2392-2405 (2015).
- 744 6. Elias, M. et al. Out of the Andes: patterns of diversification in clearwing butterflies. *Mol. Ecol.*  
745 **18**, 1716-1729 (2009).
- 746 7. Hughes, C. & Eastwood, R. Island radiation on a continental scale: Exceptional rates of plant  
747 diversification after uplift of the Andes. *Proc. Natl. Acad. Sci. U.S.A.* **103**, 10334-10339 (2006).
- 748 8. Lagomarsino, L.P., Condamine, F.L., Antonelli, A., Mulch, A. & Davis, C.C. The abiotic and  
749 biotic drivers of rapid diversification in Andean bellflowers (Campanulaceae). *New Phytologist.*  
750 **210**, 1430-1442 (2016).
- 751 9. Hoorn, C. et al. Amazonia Through Time: Andean Uplift, Climate Change, Landscape Evolution,  
752 and Biodiversity. *Science.* **330**, 927-931 (2010).
- 753 10. Gregory-Wodzicki, K.M. Uplift history of the Central and Northern Andes: A review. *Geological*  
754 *Society Of America Bulletin.* **112**, 1091-1105 (2000).
- 755 11. Leier, A., McQuarrie, N., Garzzone, C. & Eiler, J. Stable isotope evidence for multiple pulses of  
756 rapid surface uplift in the Central Andes, Bolivia. *Earth and Planetary Science Letters.* **371**, 49-  
757 58 (2013).
- 758 12. Bacon, C.D. et al. Biological evidence supports an early and complex emergence of the Isthmus  
759 of Panama. *Proc. Natl. Acad. Sci. U.S.A.* **112**, 6110-6115 (2015).
- 760 13. Wesselingh, F.P. et al. Lake Pebas: a palaeoecological reconstruction of a Miocene, long-lived  
761 lake complex in western Amazonia. *Cainozoic Res.* **1**, 35-81 (2002).
- 762 14. Wesselingh, F.P. & Salo, J.A. Miocene perspective on the evolution of the Amazonian biota.  
763 *Scripta Geol.*, 133 (2006). *Scripta Geologica.* **133**, 439-458 (2006).
- 764 15. Matos-Maraví, P. Investigating the timing of origin and evolutionary processes shaping regional  
765 species diversity: Insights from simulated data and neotropical butterfly diversification rates.  
766 *Evolution.* **70**, 1638-1650 (2016).
- 767 16. Rull, V. Origins of Biodiversity. *Science.* **331**, 398-399 (2011).
- 768 17. Rull, V. Pleistocene speciation is not refuge speciation. *J. Biogeogr.* **42**, 602-604 (2015).

- 769 18. Smith, B.T. et al. The drivers of tropical speciation. *Nature*. **515**, 406-+ (2014).
- 770 19. Gentry, A.H. Neotropical floristic diversity: Phytogeographical connections between Central and  
771 South America, Pleistocene climatic fluctuations or an accident of Andean orogeny? . *Annals of*  
772 *the Missouri Botanical Garden*. **69**, 557-593 (1982).
- 773 20. Lamas, G. *Ithomiinae in J. B. Heppner, ed. Atlas of Neotropical Lepidoptera. Checklist: Part 4A.*  
774 *Hesperioidea - Papilionoidea*. , (Association for Tropical Lepidoptera/Scientific Publishers,  
775 Gainesville, 2004).
- 776 21. Antonelli, A. & Sanmartin, I. Why are there so many plant species in the Neotropics? *Taxon*. **60**,  
777 403-414 (2011).
- 778 22. Hughes, C.E., Pennington, R.T. & Antonelli, A. Neotropical Plant Evolution: Assembling the Big  
779 Picture. *Botanical Journal of the Linnean Society*. **171**, 1-18 (2013).
- 780 23. Luebert, F. & Weigend, M. Phylogenetic insights into Andean plant diversification. *Frontiers in*  
781 *Ecology and Evolution*. **2**(2014).
- 782 24. McGuire, J.A. et al. Molecular Phylogenetics and the Diversification of Hummingbirds. *Curr.*  
783 *Biol*. **24**, 910-916 (2014).
- 784 25. Willmott, K.R., Hall, J.P.W. & Lamas, G. Systematics of *Hypanartia* (Lepidoptera : Nymphalidae  
785 : Nymphalinae), with a test for geographical speciation mechanisms in the Andes. *Systematic*  
786 *Entomology*. **26**, 369-399 (2001).
- 787 26. Casner, K.L. & Pyrcz, T.W. Patterns and timing of diversification in a tropical montane butterfly  
788 genus, Lymanopoda (Nymphalidae, Satyrinae). *Ecography*. **33**, 251-259 (2010).
- 789 27. Chazot, N. et al. mutualistic mimicry and filtering by altitude shape the structure of Andean  
790 butterfly communities. *Am. Nat*. **183**, 26-39 (2014).
- 791 28. Hall, J.P.W. Montane speciation patterns in *Ithomiola* butterflies (Lepidoptera : Riodinidae): are  
792 they consistently moving up in the world? *Proc. R. Soc. B*. **272**, 2457-2466 (2005).
- 793 29. Matos-Maravi, P.F., Pena, C., Willmott, K.R., Freitas, A.V.L. & Wahlberg, N. Systematics and  
794 evolutionary history of butterflies in the "Taygetis clade" (Nymphalidae: Satyrinae: Euptychiina):  
795 Towards a better understanding of Neotropical biogeography. *Mol. Phylogenet. Evol*. **66**, 54-68  
796 (2013).
- 797 30. Massardo, D., Fornel, R., Kronforst, M., Goncalves, G.L. & Moreira, G.R.P. Diversification of  
798 the silverspot butterflies (Nymphalidae) in the Neotropics inferred from multi-locus DNA  
799 sequences. *Mol. Phylogenet. Evol*. **82**, 156-165 (2015).
- 800 31. Rosser, N., Phillimore, A.B., Huertas, B., Willmott, K.R. & Mallet, J. Testing historical  
801 explanations for gradients in species richness in heliconiine butterflies of tropical America. *Biol.*  
802 *J. Linnean Soc*. **105**, 479-497 (2012).

- 803 32. Condamine, F.L., Silva-Brandao, K.L., Kergoat, G.J. & Sperling, F.A.H. Biogeographic and  
804 diversification patterns of Neotropical Troidini butterflies (Papilionidae) support a museum model  
805 of diversity dynamics for Amazonia. *BMC Evol. Biol.* **12**(2012).
- 806 33. Beccaloni, G.W. Ecology, behaviour and natural history of ithomiine butterflies (Lepidoptera:  
807 Nymphalidae) and their mimics in Ecuador. . *Trop. Lep.* **8**, 103-124 (1997).
- 808 34. Chazot, N. et al. Into the Andes: multiple independent colonizations drive montane diversity in  
809 the Neotropical clearwing butterflies Godyridina. *Mol. Ecol.* **25**, 5765–5784 (2016).
- 810 35. Jiggins, C.D., Mallarino, R., Willmott, K.R. & Bermingham, E. The phylogenetic pattern of  
811 speciation and wing pattern change in neotropical Ithomia butterflies (Lepidoptera :  
812 Nymphalidae). *Evolution.* **60**, 1454-1466 (2006).
- 813 36. Chazot, N. et al. Patterns of species, phylogenetic and mimicry diversity of clearwing butterflies  
814 in the Neotropics. . in *Biodiversity Conservation and Phylogenetic Systematics* (eds. Pellens, R. &  
815 Grandcolas, P.) 333-354 (Springer, 2016).
- 816 37. Garzón-Orduña, I.J., Silva-Brandao, K.L., Willmott, K.R., Freitas, A.V.L. & Brower, A.V.Z.  
817 Incompatible Ages for Clearwing Butterflies Based on Alternative Secondary Calibrations. *Syst.*  
818 *Biol.* **64**, 752-67 (2015).
- 819 38. Wahlberg, N. et al. Nymphalid butterflies diversify following near demise at the  
820 Cretaceous/Tertiary boundary. *Proc. R. Soc. B.* **276**, 4295-4302 (2009).
- 821 39. Neild, A. *The Butterflies of Venezuela. Part 2: Nymphalidae II (Acraeinae, Libytheinae,*  
822 *Nymphalinae, Ithomiinae, Morphinae). A comprehensive guide to the identification of adult*  
823 *Nymphalidae, Papilionidae, and Pieridae.*, 276 (Meridian Publications, London, 2008).
- 824 40. Bolaños M., I.A., Zambrano G., G. & Willmott, K.R. Descripción de los estados inmaduros de  
825 *Pteronymia zerlina zerlina*, *P. zerlina machay*, *P. veia florea* y *P. medellina* de Colombia y del  
826 Ecuador (Lepidoptera: Nymphalidae): Ithomiini. . *Tropical Lepidoptera Research.* **21**, 27-33  
827 (2011).
- 828 41. Brown, K.S. & Freitas, A.V.L. Juvenile stages of Ithomiinae : overview and systematics  
829 (Lepidoptera: Nymphalidae). *Trop. Lep.* **5**, 9-20 (1994).
- 830 42. Särkinen, T., Bohs, L., Olmstead, R.G. & Knapp, S. A phylogenetic framework for evolutionary  
831 study of the nightshades (Solanaceae): a dated 1000-tip tree. *BMC Evol. Biol.* **13**(2013).
- 832 43. Magallón, S., Gomez-Acevedo, S., Sanchez-Reyes, L.L. & Hernandez-Hernandez, T. A  
833 metacalibrated time-tree documents the early rise of flowering plant phylogenetic diversity. *New*  
834 *Phytologist.* **207**, 437-453 (2015).
- 835 44. Drummond, A.J., Suchard, M.A., Xie, D. & Rambaut, A. Bayesian Phylogenetics with BEAUti  
836 and the BEAST 1.7. *Molecular Biology and Evolution.* **29**, 1969-1973 (2012).

- 837 45. Yu, Y., Harris, A.J. & He, X.-J. RASP (Reconstruct Ancestral State in Phylogenies), version 2.0.  
838 Available: <http://mnh.scu.edu.cn/soft/blog/RASP> (2013).
- 839 46. Pagel, M. Inferring the historical patterns of biological evolution. *Nature*. **401**, 877-884 (1999).
- 840 47. Alfaro, M.E. et al. Nine exceptional radiations plus high turnover explain species diversity in  
841 jawed vertebrates. *Proc. Natl. Acad. Sci. U.S.A.* **106**, 13410-13414 (2009).
- 842 48. Morlon, H., Parsons, T.L. & Plotkin, J.B. Reconciling molecular phylogenies with the fossil  
843 record. *Proc. Natl. Acad. Sci. U.S.A.* **108**, 16327-16332 (2011).
- 844 49. De-Silva, D.L. et al. Molecular phylogenetics of the neotropical butterfly subtribe Oleriina  
845 (Nymphalidae: Danainae: Ithomiini). *Mol. Phylogenet. Evol.* **55**, 1032-1041 (2010).
- 846 50. Mallarino, R., Bermingham, E., Willmott, K.R., Whinnett, A. & Jiggins, C.D. Molecular  
847 systematics of the butterfly genus *Ithomia* (Lepidoptera : Ithomiinae): a composite phylogenetic  
848 hypothesis based on seven genes. *Mol. Phylogenet. Evol.* **34**, 625-644 (2005).
- 849 51. Heliconius\_Genome\_Consortium. Butterfly genome reveals promiscuous exchange of mimicry  
850 adaptations among species. *Nature*. **487**, 94-98 (2012).
- 851 52. Martin, S.H. et al. Genome-wide evidence for speciation with gene flow in *Heliconius* butterflies.  
852 *Genome Research*. **23**, 1817-1828 (2013).
- 853 53. Mavarez, J. et al. Speciation by hybridization in *Heliconius* butterflies. *Nature*. **441**, 868-871  
854 (2006).
- 855 54. Foster, C.S.P. et al. Evaluating the Impact of Genomic Data and Priors on Bayesian Estimates of  
856 the Angiosperm Evolutionary Timescale. *Syst. Biol.* **syw086**(2016).
- 857 55. Wilf, P., Carvalho, M.R., Gandolfo, M.A. & Cúneo, N.R. Eocene lantern fruits from Gondwanan  
858 Patagonia and the early origins of Solanaceae. *Science*. **355**, 71-75 (2017).
- 859 56. Knapp, S. Tobacco to tomatoes: a phylogenetic perspective on fruit diversity in the Solanaceae.  
860 *Journal of Experimental Botany*. **53**, 2001-2022 (2002).
- 861 57. He, C.Y. & Saedler, H. Heterotopic expression of MPF2 is the key to the evolution of the Chinese  
862 lantern of *Physalis*, a morphological novelty in Solanaceae. *Proc. Natl. Acad. Sci. U.S.A.* **102**,  
863 5779-5784 (2005).
- 864 58. Hu, J.Y. & Saedler, H. Evolution of the inflated calyx syndrome in solanaceae. *Molecular Biology  
865 and Evolution*. **24**, 2443-2453 (2007).
- 866 59. Khan, M.R., Hu, J.Y., Riss, S., He, C.Y. & Saedler, H. MPF2-Like-A MADS-Box Genes Control  
867 the Inflated Calyx Syndrome in *Withania* (Solanaceae): Roles of Darwinian Selection. *Molecular  
868 Biology and Evolution*. **26**, 2463-2473 (2009).
- 869 60. Sauquet, H. A practical guide to molecular dating. *Comptes Rendus Palevol*. **12**, 355-367 (2013).

- 870 61. Blandin, P. & Purser, B. Evolution and diversification of neotropical butterflies: insights from the  
871 biogeography and phylogeny of the genus *Morpho* Fabricius, 1807 (Nymphalidae: Morphinae),  
872 with a review of geodynamics of South America. *Tropical Lepidoptera Research*. **23**, 62-85  
873 (2013).
- 874 62. Jørgensen, P.M. et al. Regional patterns of vascular plant diversity and endemism. in *Climate*  
875 *Change and Biodiversity in the Tropical Andes. Inter-American Institute for Global Change*  
876 *Research*  
877 *(IAI) and Scientific Committee on Problems of the Environment (SCOPE), 192–203*. (eds. Herzog, S.K.,  
878 Martínez, R., Jørgensen, P.M. & Tiessen, H.) 192–203 (2011).
- 879 63. Knapp, S. Assessing patterns of plant endemism in neotropical uplands. *Bot. Rev.* **68**, 22-37  
880 (2002).
- 881 64. Chamberlain, N.L., Hill, R.I., Kapan, D.D., Gilbert, L.E. & Kronforst, M.R. Polymorphic  
882 Butterfly Reveals the Missing Link in Ecological Speciation. *Science*. **326**, 847-850 (2009).
- 883 65. Merrill, R.M. et al. Disruptive ecological selection on a mating cue. *Proc. R. Soc. B.* **279**, 4907-  
884 4913 (2012).
- 885 66. Jiggins, C.D., Naisbit, R.E., Coe, R.L. & Mallet, J. Reproductive isolation caused by colour  
886 pattern mimicry. *Nature*. **411**, 302-305 (2001).
- 887 67. Merrill, R.M. et al. Mate preference across the speciation continuum in a clade of mimetic  
888 butterflies. *Evolution*. **65**, 1489-1500 (2011).
- 889 68. Merrill, R.M., Van Schooten, B., Scott, J.A. & Jiggins, C.D. Pervasive genetic associations  
890 between traits causing reproductive isolation in *Heliconius* butterflies. *Proc. R. Soc. B.* **278**, 511-  
891 518 (2011).
- 892 69. McClure, M. & Elias, M. Ecology, life history, and genetic differentiation in the Neotropical  
893 *Melinaea* (Nymphalidae: ithomiini) butterflies from north-eastern Peru. . *Zoological Journal of*  
894 *the Linnean Society*. **Early view**. (2016).
- 895 70. Elias, M. et al. Phylogenetic hypothesis, pattern of speciation and evolution of wing pattern in  
896 neotropical Napeogenes butterflies (Lepidoptera: Nymphalidae). in *7th International Workshop*  
897 *on the Molecular Biology and Genetics of the Lepidoptera August 20–26, 2006, Orthodox*  
898 *Academy of Crete, Kolymvari, Crete, Greece. 52pp.* , Vol. 7:29 (eds. Iatrou, K. & Couble, P.) 13-  
899 14 (Journal of Insect Science, 2007).
- 900 71. Antonelli, A., Nylander, J.A.A., Persson, C. & Sanmartin, I. Tracing the impact of the Andean  
901 uplift on Neotropical plant evolution. *Proc. Natl. Acad. Sci. U.S.A.* **106**, 9749-9754 (2009).
- 902 72. Bloch, J.I. et al. First North American fossil monkey and early Miocene tropical biotic  
903 interchange. *Nature*. **533**, 243+ (2016).

- 904 73. Farris, D.W. et al. Fracturing of the Panamanian Isthmus during initial collision with South  
905 America. *Geology*. **39**, 1007-1010 (2011).
- 906 74. Montes, C. et al. Middle Miocene closure of the Central American Seaway. *Science*. **348**, 226-229  
907 (2015).
- 908 75. Sedano, R.E. & Burns, K.J. Are the Northern Andes a species pump for Neotropical birds?  
909 Phylogenetics and biogeography of a clade of Neotropical tanagers (Aves: Thraupini). *J.*  
910 *Biogeogr.* **37**, 325-343 (2010).
- 911 76. Velazco, P.M. & Patterson, B.D. Diversification of the Yellow-shouldered bats, Genus *Sturnira*  
912 (Chiroptera, Phyllostomidae), in the New World tropics. *Mol. Phylogenet. Evol.* **68**, 683-698  
913 (2013).
- 914 77. Goloboff, F., Farris, J.S. & Nixon, K.C. TNT: Tree Analysis using New Technology. Program  
915 and documentation, available from the authors, and at <http://www.zmuc.dk/public/phylogeny>.  
916 (2003).
- 917 78. Nixon, K.C. Winclada (Beta). Published by the author, Ithaca, NY. (1999).
- 918 79. Stamatakis, A., Hoover, P. & Rougemont, J. A Rapid Bootstrap Algorithm for the RAxML Web  
919 Servers. *Syst. Biol.* **57**, 758-771 (2008).
- 920 80. Ronquist, F. et al. MrBayes 3.2: Efficient Bayesian Phylogenetic Inference and Model Choice  
921 Across a Large Model Space. *Syst. Biol.* **61**, 539-542 (2012).
- 922 81. Lanfear, R., Calcott, B., Ho, S.Y.W. & Guindon, S. PartitionFinder: Combined Selection of  
923 Partitioning Schemes and Substitution Models for Phylogenetic Analyses. *Molecular Biology and*  
924 *Evolution*. **29**, 1695-1701 (2012).
- 925 82. Miller, M.A., Pfeiffer, W. & Schwartz, T. Creating the CIPRES Science Gateway for Inference of  
926 Large Phylogenetic Trees. . *SC10 Workshop on Gateway Computing Environments (GCE10)*.  
927 (2010).
- 928 83. Huelsenbeck, J.P., Larget, B. & Alfaro, M.E. Bayesian phylogenetic model selection using  
929 reversible jump Markov chain Monte Carlo. *Molecular Biology and Evolution*. **21**, 1123-1133  
930 (2004).
- 931 84. Willmott, K.R. & Freitas, A.V.L. Higher-level phylogeny of the Ithomiinae (Lepidoptera :  
932 Nymphalidae): classification, patterns of larval hostplant colonization and diversification.  
933 *Cladistics*. **22**, 297-368 (2006).
- 934 85. Xie, W.G., Lewis, P.O., Fan, Y., Kuo, L. & Chen, M.H. Improving Marginal Likelihood  
935 Estimation for Bayesian Phylogenetic Model Selection. *Syst. Biol.* **60**, 150-160 (2011).
- 936 86. Ree, R.H. & Smith, S.A. Maximum likelihood inference of geographic range evolution by  
937 dispersal, local extinction, and cladogenesis. *Syst. Biol.* **57**, 4-14 (2008).

- 938 87. Pagel, M., Meade, A. & Barker, D. Bayesian estimation of ancestral character states on  
939 phylogenies. *Syst. Biol.* **53**, 673-684 (2004).
- 940 88. Revell, L.J. phytools: an R package for phylogenetic comparative biology (and other things).  
941 *Methods in Ecology and Evolution.* **3**, 217-223 (2012).
- 942 89. Rabosky, D.L. Automatic Detection of Key Innovations, Rate Shifts, and Diversity-Dependence  
943 on Phylogenetic Trees. *PLoS ONE.* **9**(2014).
- 944 90. Moore, B.R., Hohna, S., May, M.R., Rannala, B. & Huelsenbeck, J.P. Critically evaluating the  
945 theory and performance of Bayesian analysis of macroevolutionary mixtures. *Proc. Natl. Acad.*  
946 *Sci. U.S.A.* **113**, 9569-9574 (2016).
- 947 91. Pennell, M.W. et al. geiger v2.0: an expanded suite of methods for fitting macroevolutionary  
948 models to phylogenetic trees. *Bioinformatics.* **30**, 2216-2218 (2014).
- 949 92. May, M.R. & Moore, B.R. How Well Can We Detect Lineage-Specific Diversification-Rate  
950 Shifts? A Simulation Study of Sequential AIC Methods. *Syst. Biol.* **65**, 1076-1084 (2016).

951  
952



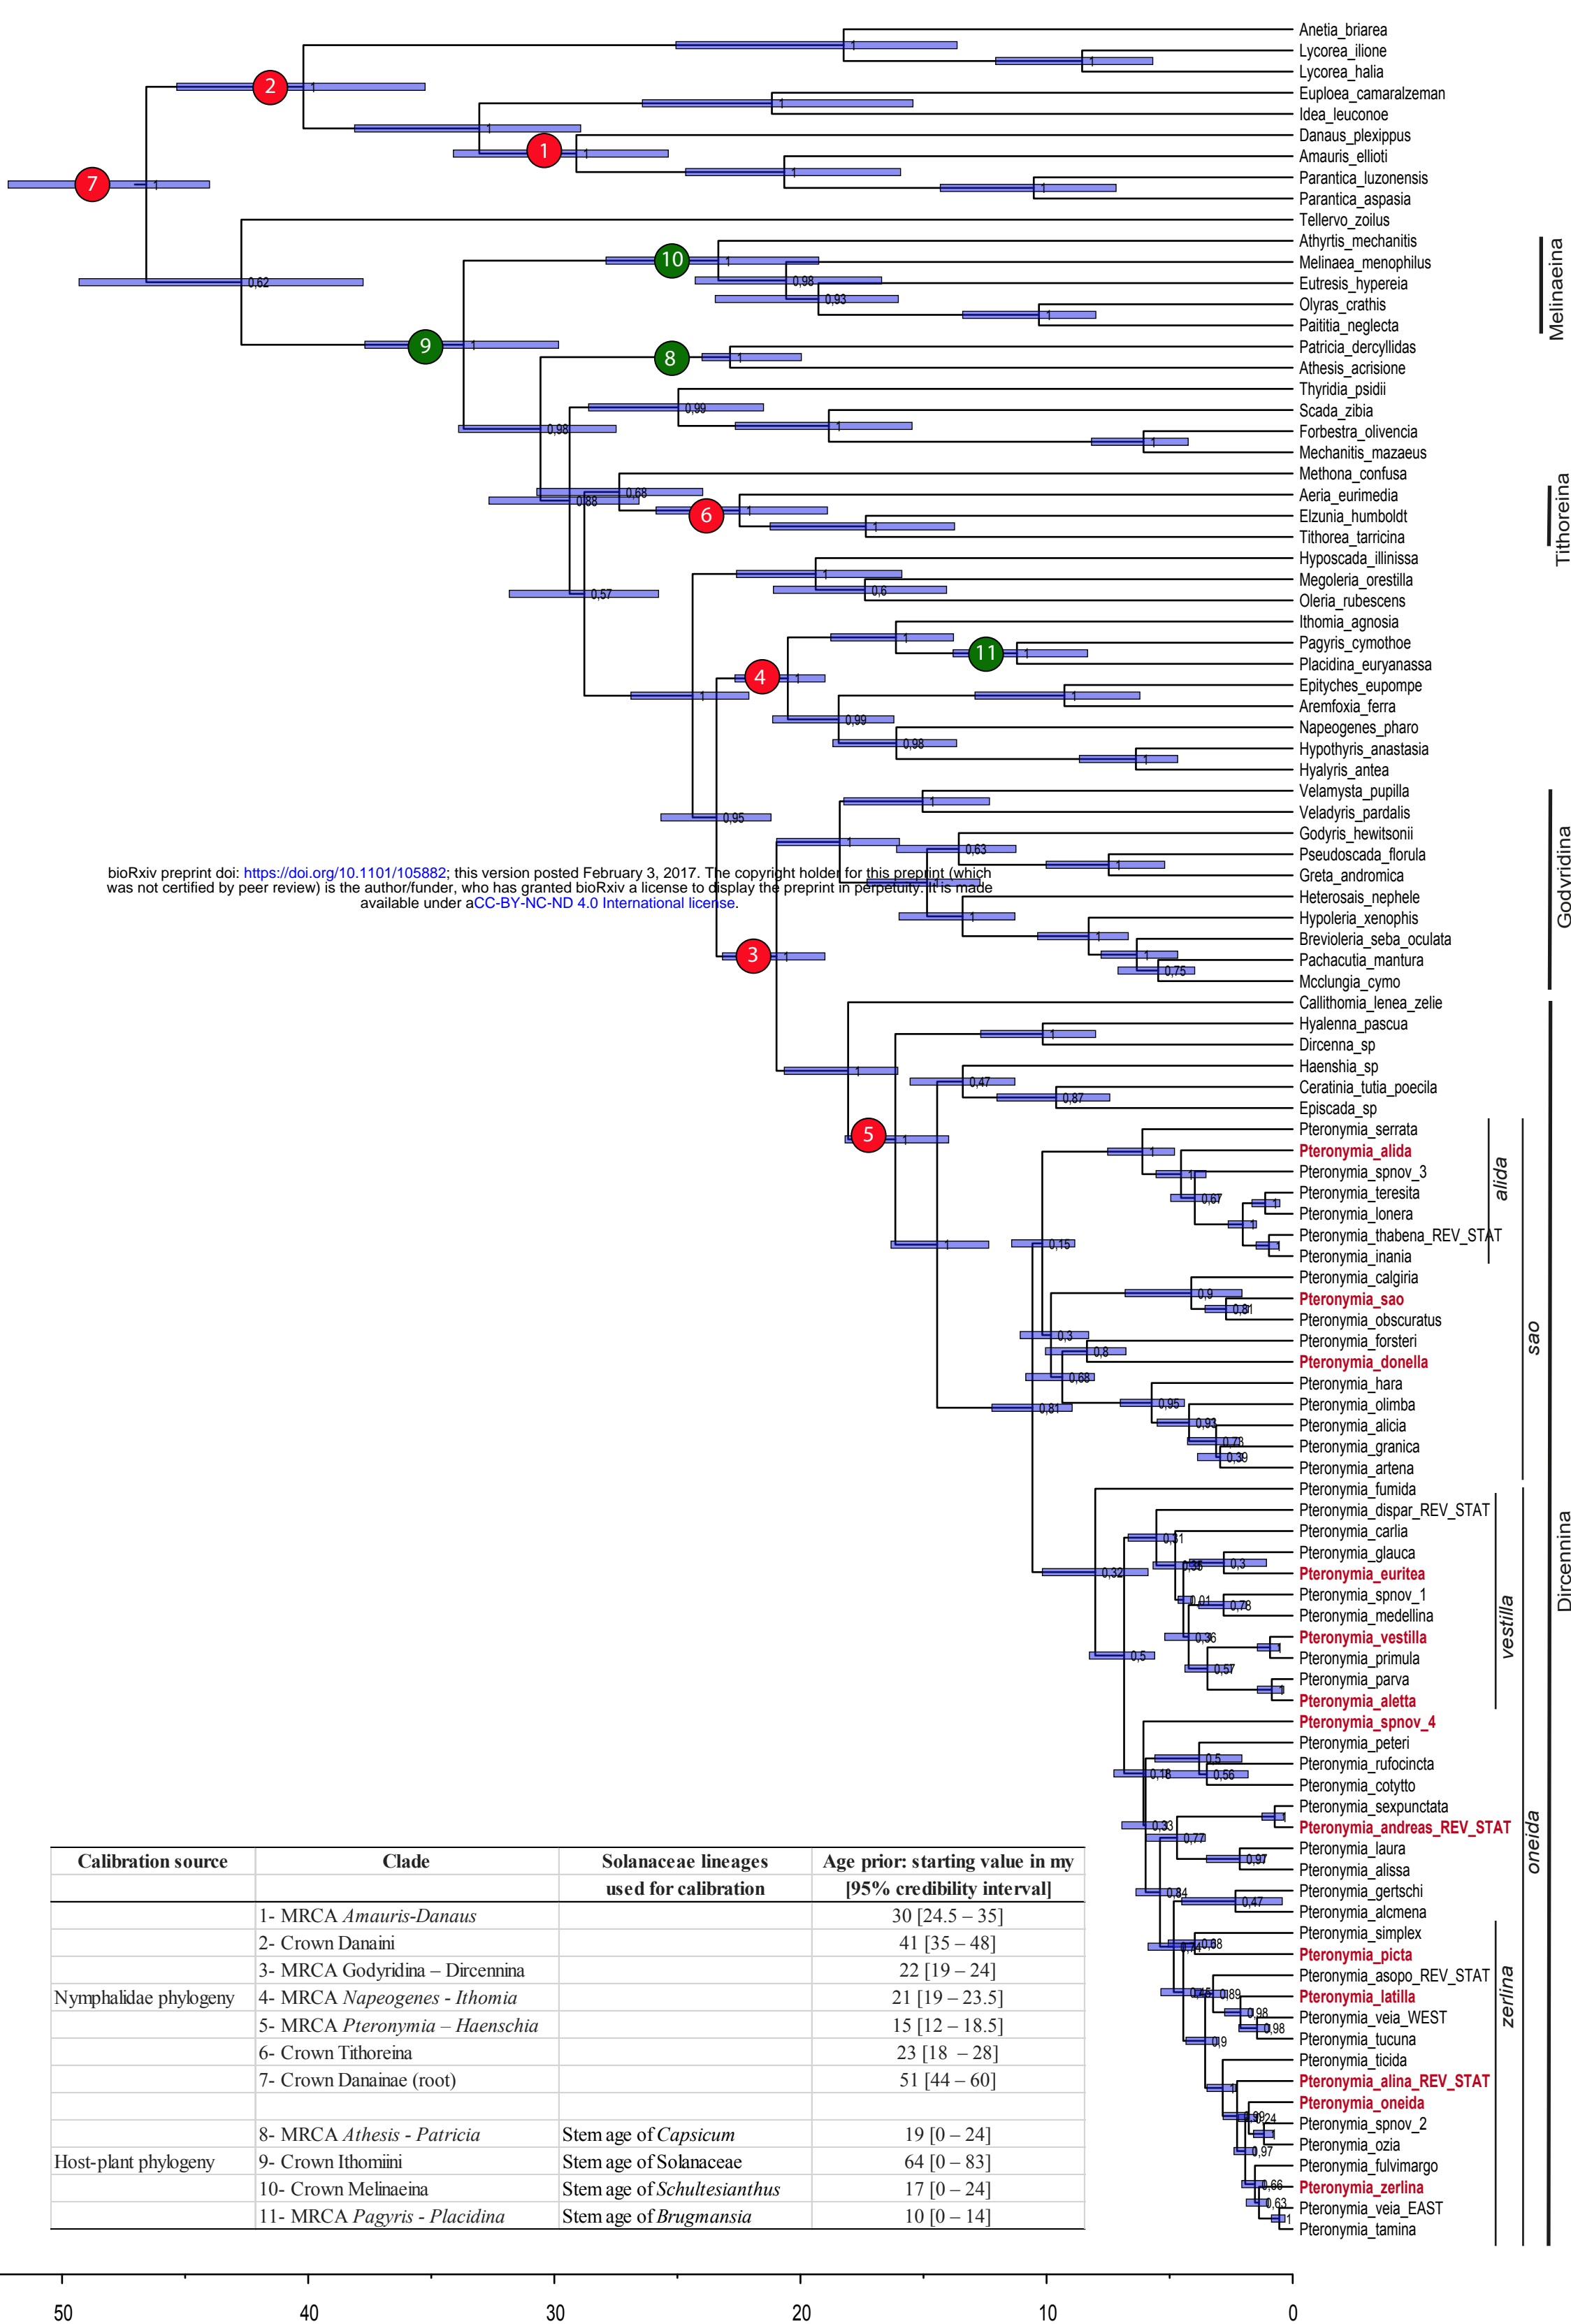

bioRxiv preprint doi: <https://doi.org/10.1101/105882>; this version posted February 3, 2017. The copyright holder for this preprint (which was not certified by peer review) is the author/funder, who has granted bioRxiv a license to display the preprint in perpetuity. It is made available under aCC-BY-NC-ND 4.0 International license.

| Calibration source    | Clade                                 | Solanaceae lineages used for calibration | Age prior: starting value in my [95% credibility interval] |
|-----------------------|---------------------------------------|------------------------------------------|------------------------------------------------------------|
|                       | 1- MRCA <i>Amauris-Danaus</i>         |                                          | 30 [24.5 – 35]                                             |
|                       | 2- Crown Danaini                      |                                          | 41 [35 – 48]                                               |
|                       | 3- MRCA Godyridina – Dircennina       |                                          | 22 [19 – 24]                                               |
| Nymphalidae phylogeny | 4- MRCA <i>Napeogenes - Ithomia</i>   |                                          | 21 [19 – 23.5]                                             |
|                       | 5- MRCA <i>Pteronymia – Haenschia</i> |                                          | 15 [12 – 18.5]                                             |
|                       | 6- Crown Tithoreina                   |                                          | 23 [18 – 28]                                               |
|                       | 7- Crown Danainae (root)              |                                          | 51 [44 – 60]                                               |
|                       | 8- MRCA <i>Athesis - Patricia</i>     | Stem age of <i>Capsicum</i>              | 19 [0 – 24]                                                |
| Host-plant phylogeny  | 9- Crown Ithomiini                    | Stem age of Solanaceae                   | 64 [0 – 83]                                                |
|                       | 10- Crown Melinaeina                  | Stem age of <i>Schultesianthus</i>       | 17 [0 – 24]                                                |
|                       | 11- MRCA <i>Pagyris - Placidina</i>   | Stem age of <i>Brugmansia</i>            | 10 [0 – 14]                                                |

Danaini

Melinaeina

Tithoreina

Godyridina

Ithomiini

*alida*

*sao*

Dircennina

*vestilla*

*oneida*

*zerlina*

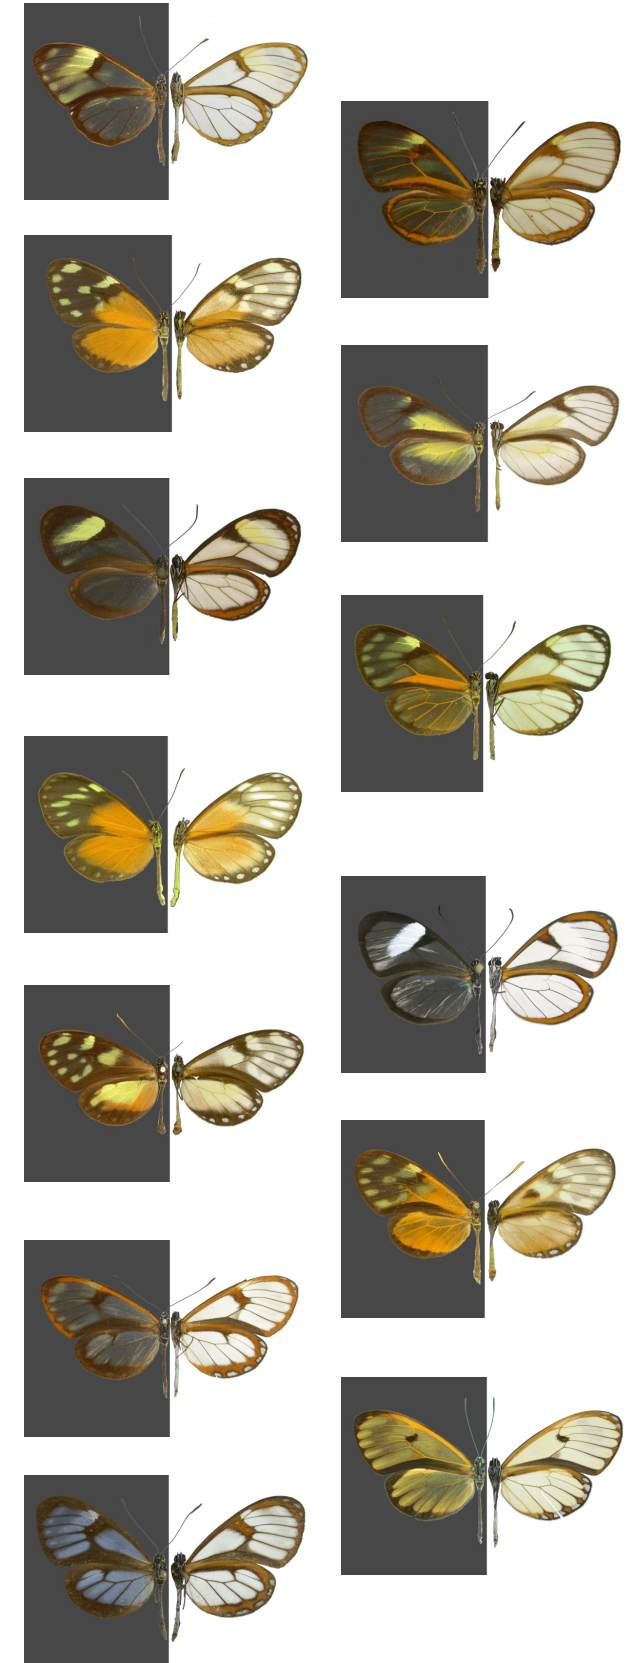

50 40 30 20 10 0

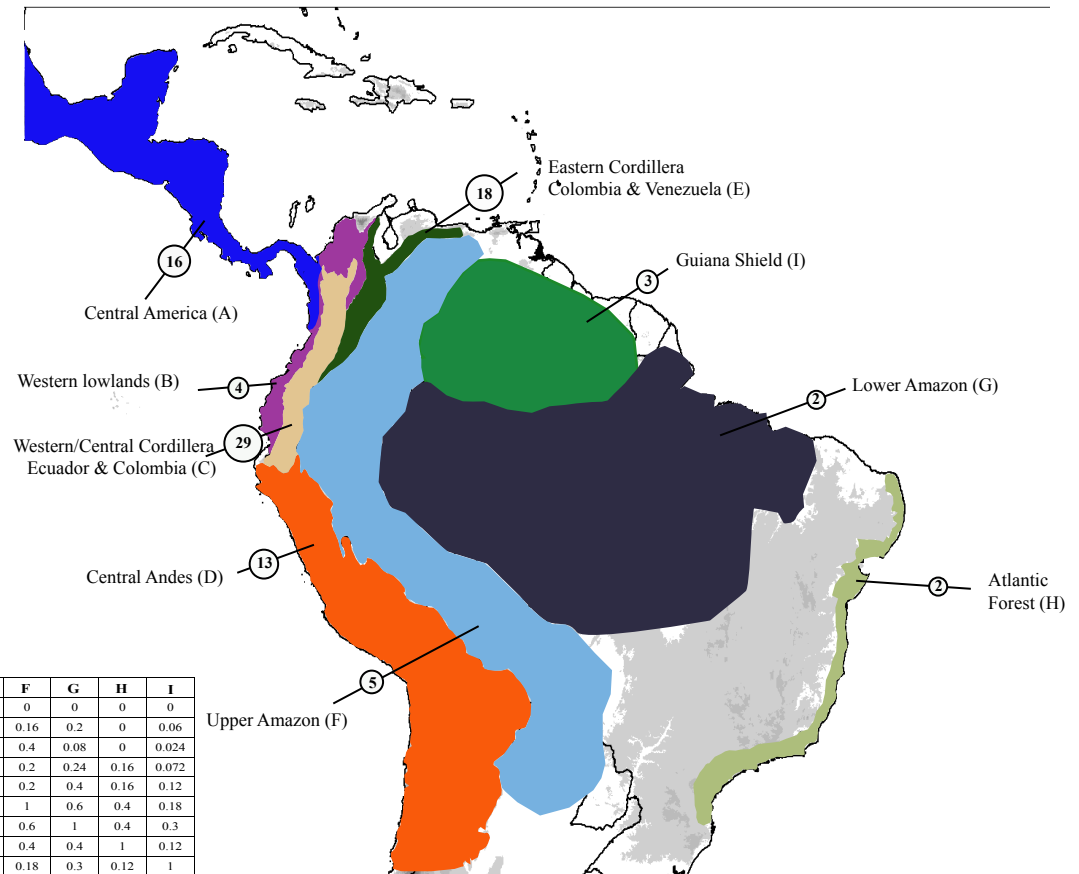

### 14 - 8 mya

|   | A | B    | C     | D     | E    | F    | G    | H    | I     |
|---|---|------|-------|-------|------|------|------|------|-------|
| A | 1 | 0    | 0     | 0     | 0    | 0    | 0    | 0    | 0     |
| B | 0 | 1    | 0.4   | 0.24  | 0.4  | 0.16 | 0.2  | 0    | 0.06  |
| C | 0 | 0.4  | 1     | 0.6   | 0.6  | 0.4  | 0.08 | 0    | 0.024 |
| D | 0 | 0.24 | 0.6   | 1     | 0.36 | 0.2  | 0.24 | 0.16 | 0.072 |
| E | 0 | 0.4  | 0.6   | 0.36  | 1    | 0.2  | 0.4  | 0.16 | 0.12  |
| F | 0 | 0.16 | 0.4   | 0.2   | 0.2  | 1    | 0.6  | 0.4  | 0.18  |
| G | 0 | 0.2  | 0.08  | 0.12  | 0.4  | 0.6  | 1    | 0.4  | 0.3   |
| H | 0 | 0    | 0     | 0.08  | 0.16 | 0.4  | 0.4  | 1    | 0.12  |
| I | 0 | 0.06 | 0.024 | 0.072 | 0.12 | 0.18 | 0.3  | 0.12 | 1     |

### 8 - 5 mya

|   | A   | B      | C     | D     | E    | F    | G     | H    | I      |
|---|-----|--------|-------|-------|------|------|-------|------|--------|
| A | 1   | 0.2    | 0.1   | 0     | 0    | 0    | 0     | 0    | 0      |
| B | 0.2 | 1      | 0.2   | 0.12  | 0.2  | 0.04 | 0.008 | 0    | 0.0024 |
| C | 0.1 | 0.2    | 1     | 0.6   | 0.6  | 0.2  | 0.12  | 0.08 | 0.036  |
| D | 0   | 0.12   | 0.6   | 1     | 0.36 | 0.2  | 0.12  | 0.08 | 0.036  |
| E | 0   | 0.2    | 0.6   | 0.36  | 1    | 0.2  | 0.2   | 0.08 | 0.06   |
| F | 0   | 0.04   | 0.2   | 0.2   | 0.2  | 1    | 0.6   | 0.4  | 0.18   |
| G | 0   | 0.008  | 0.12  | 0.12  | 0.2  | 0.6  | 1     | 0.4  | 0.3    |
| H | 0   | 0      | 0.08  | 0.08  | 0.08 | 0.4  | 0.4   | 1    | 0.12   |
| I | 0   | 0.0024 | 0.036 | 0.036 | 0.06 | 0.18 | 0.3   | 0.12 | 1      |

### 5 - 0 mya

|   | A    | B      | C     | D     | E    | F    | G     | H    | I      |
|---|------|--------|-------|-------|------|------|-------|------|--------|
| A | 1    | 0.6    | 0.3   | 0     | 0.06 | 0    | 0     | 0    | 0      |
| B | 0.6  | 1      | 0.1   | 0.06  | 0.1  | 0.01 | 0.001 | 0    | 0.0003 |
| C | 0.3  | 0.1    | 1     | 0.6   | 0.6  | 0.1  | 0.06  | 0.04 | 0.018  |
| D | 0    | 0.06   | 0.6   | 1     | 0.36 | 0.1  | 0.06  | 0.04 | 0.018  |
| E | 0.06 | 0.1    | 0.6   | 0.36  | 1    | 0.1  | 0.1   | 0.04 | 0.03   |
| F | 0    | 0.01   | 0.1   | 0.1   | 0.1  | 1    | 0.6   | 0.4  | 0.18   |
| G | 0    | 0.001  | 0.06  | 0.06  | 0.1  | 0.6  | 1     | 0.4  | 0.3    |
| H | 0    | 0      | 0.04  | 0.04  | 0.04 | 0.4  | 0.4   | 1    | 0.12   |
| I | 0    | 0.0003 | 0.018 | 0.018 | 0.03 | 0.18 | 0.3   | 0.12 | 1      |

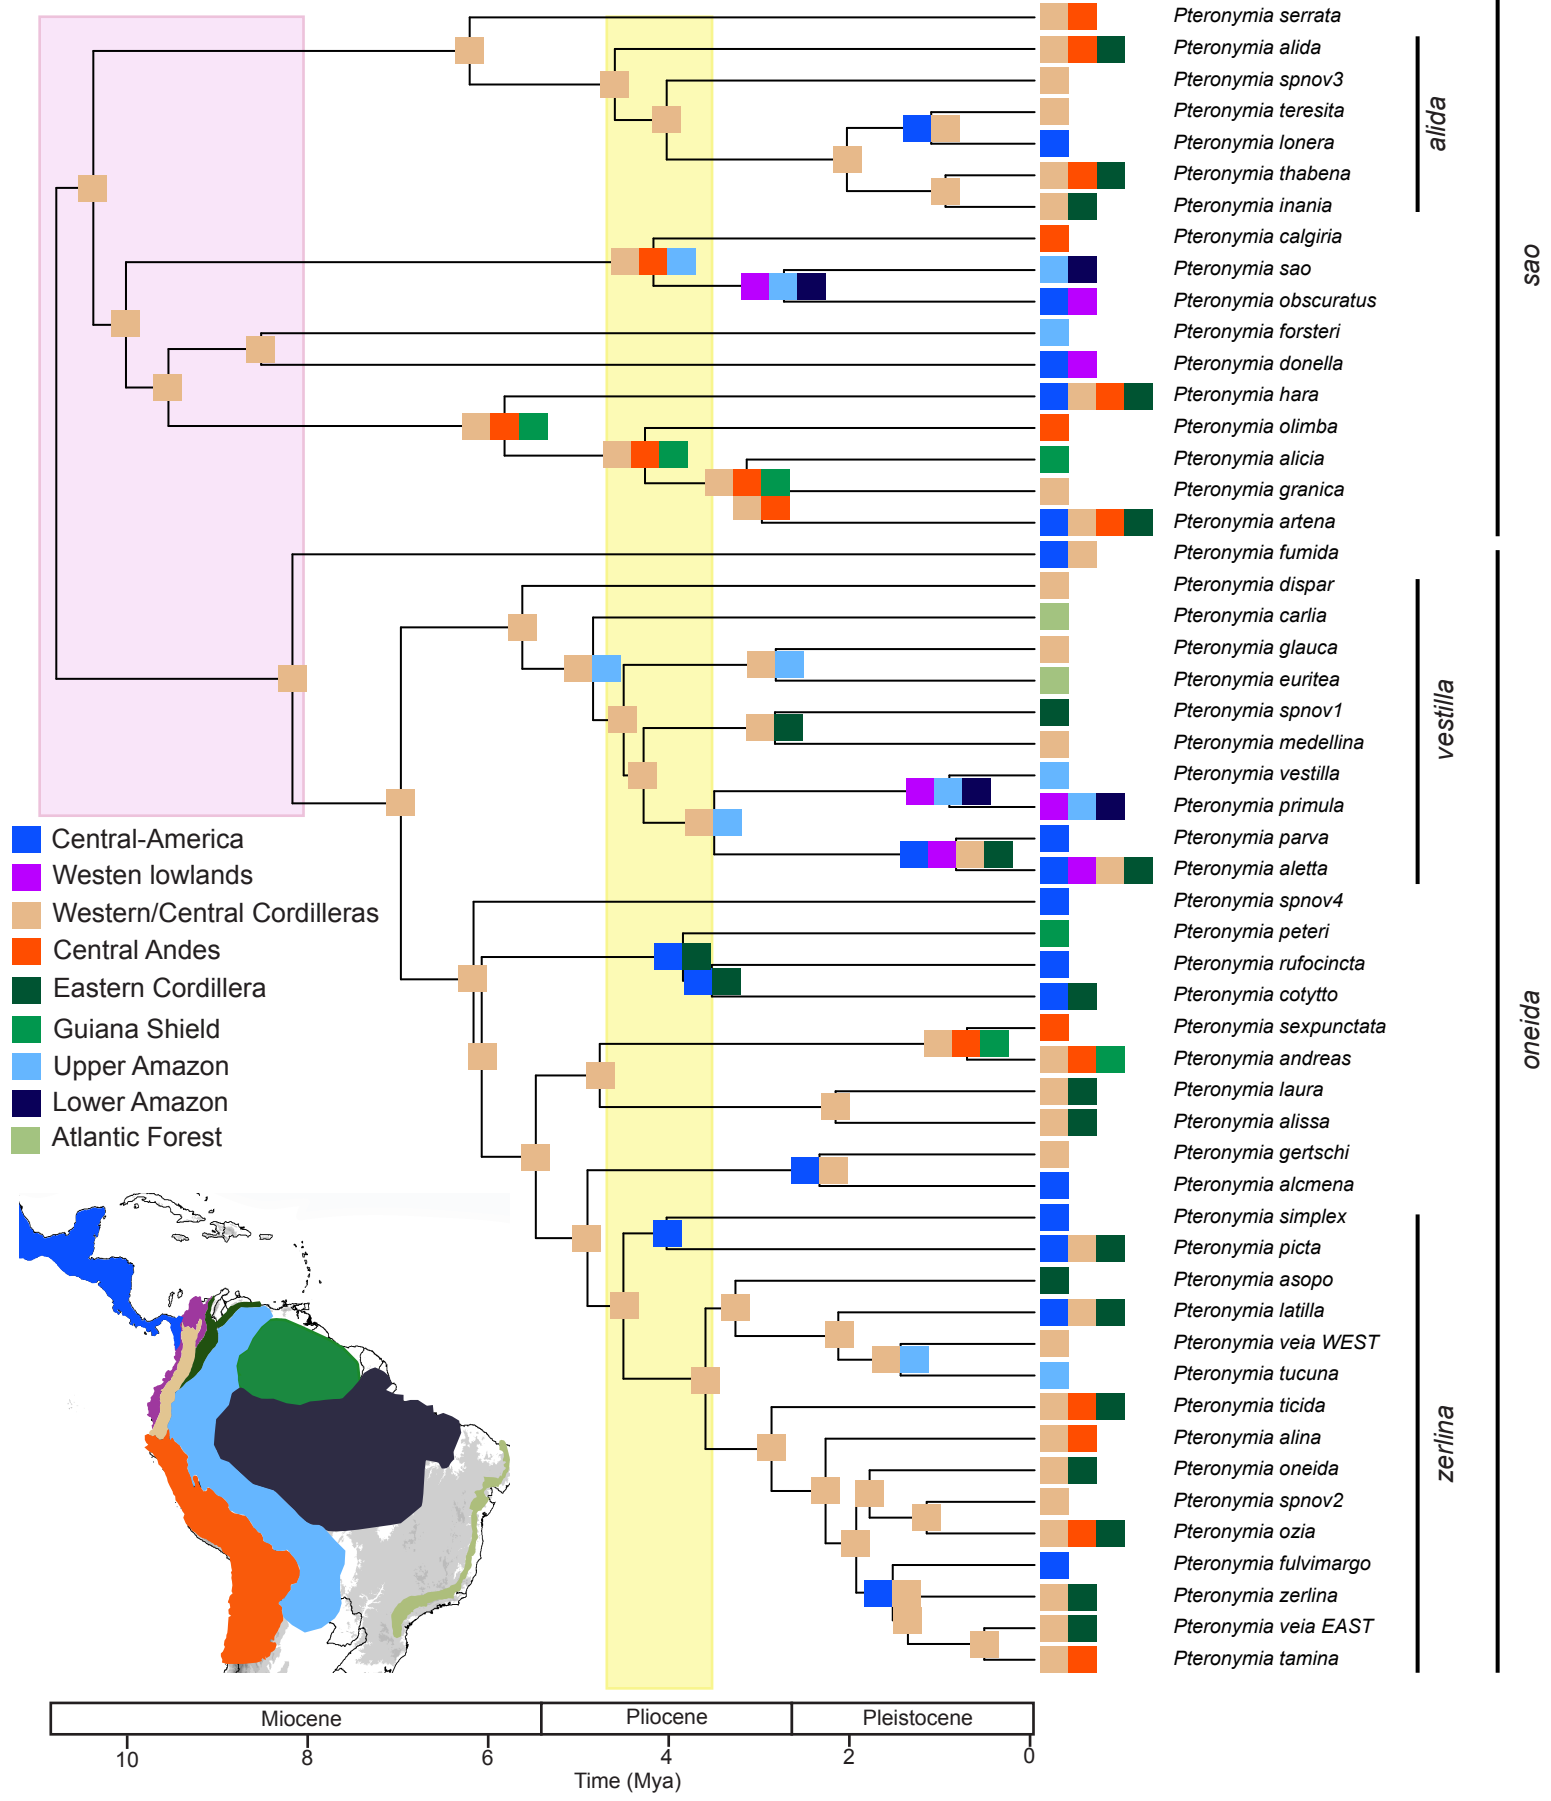

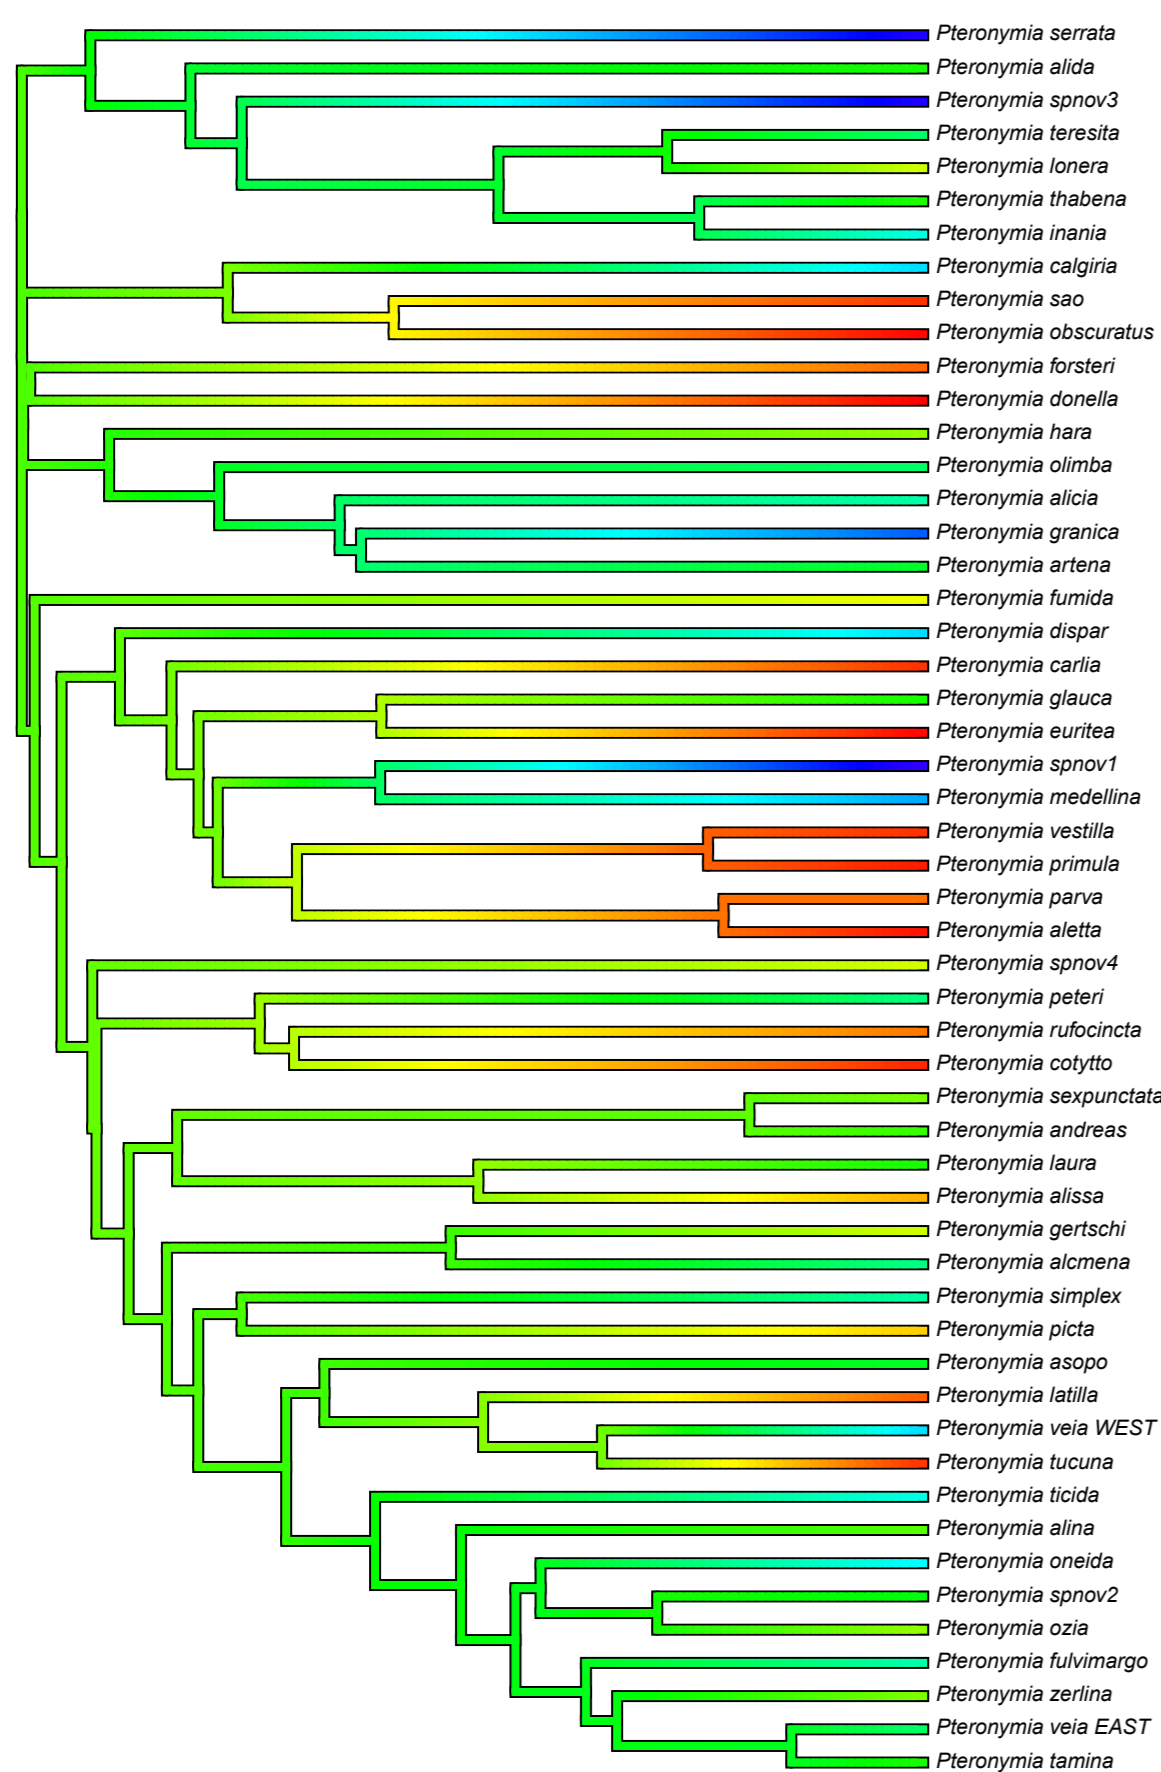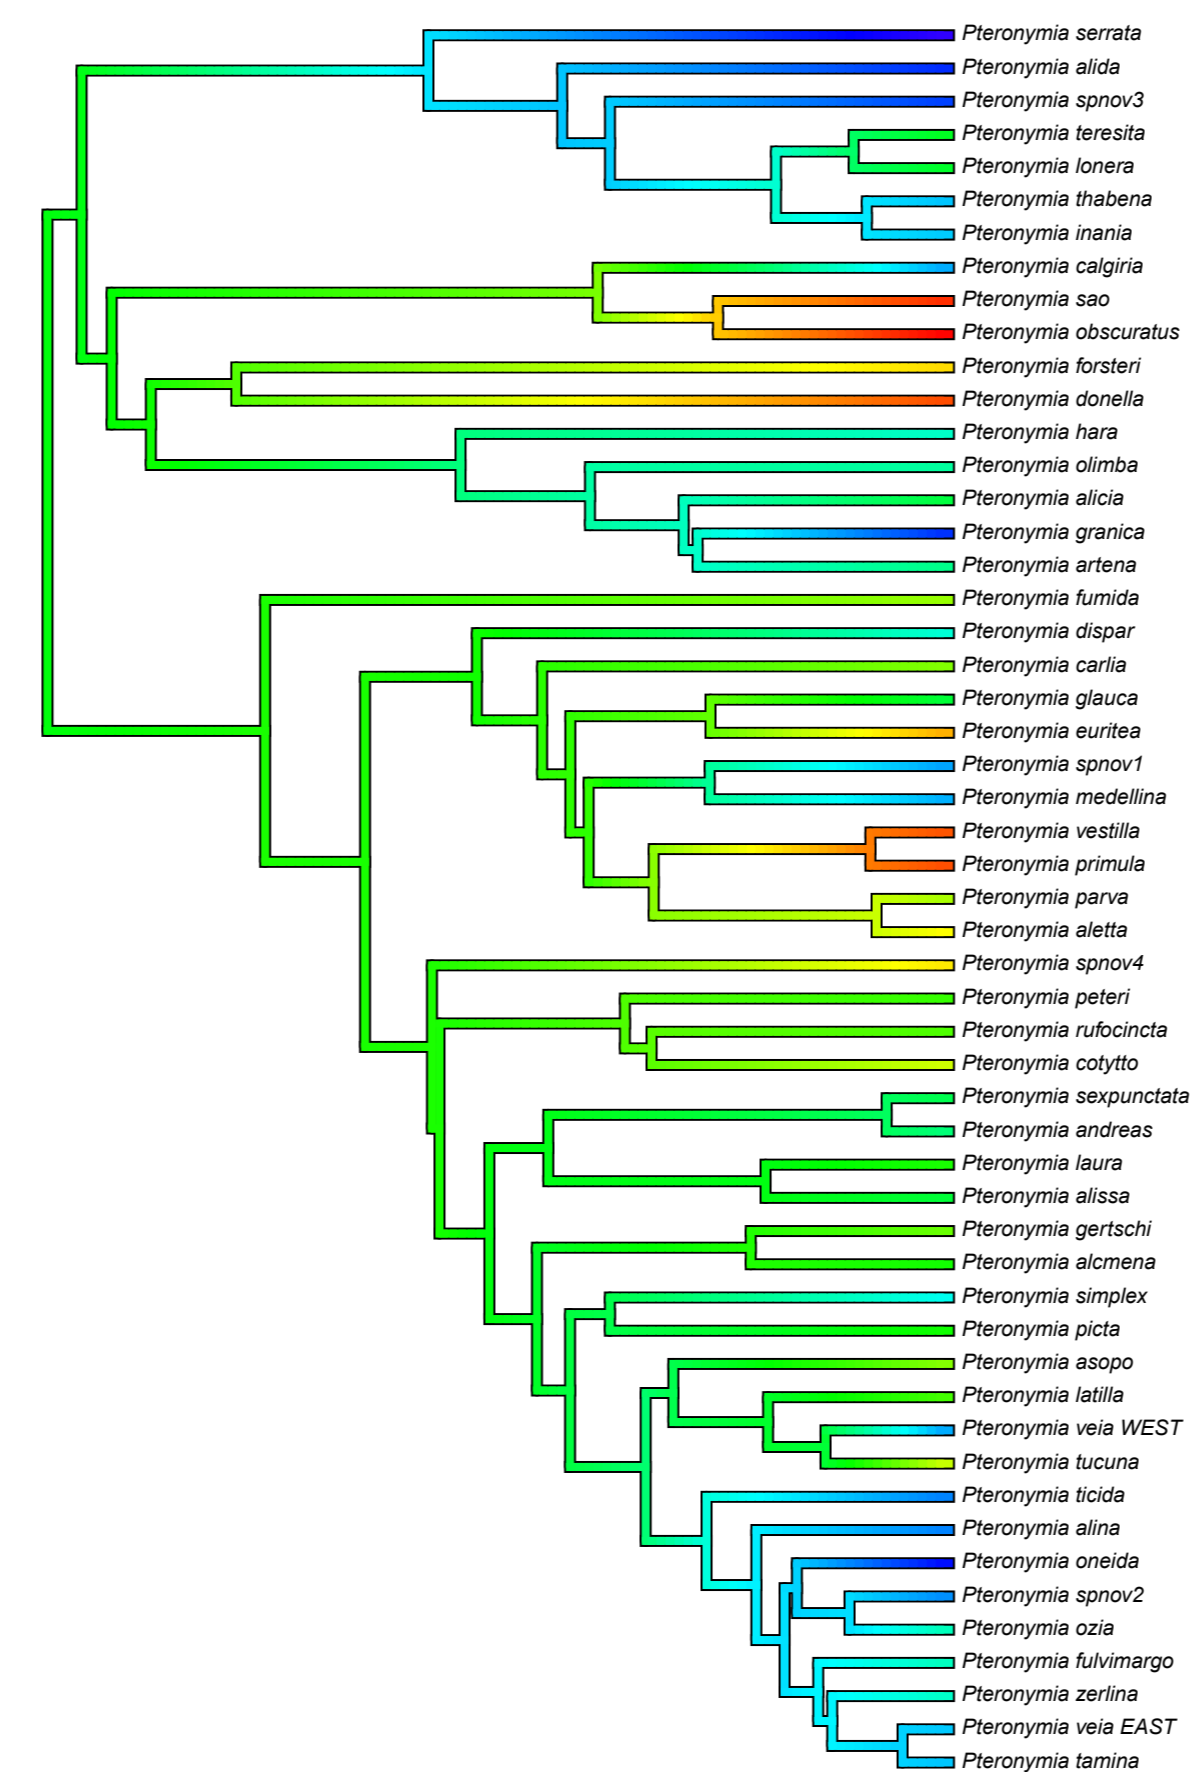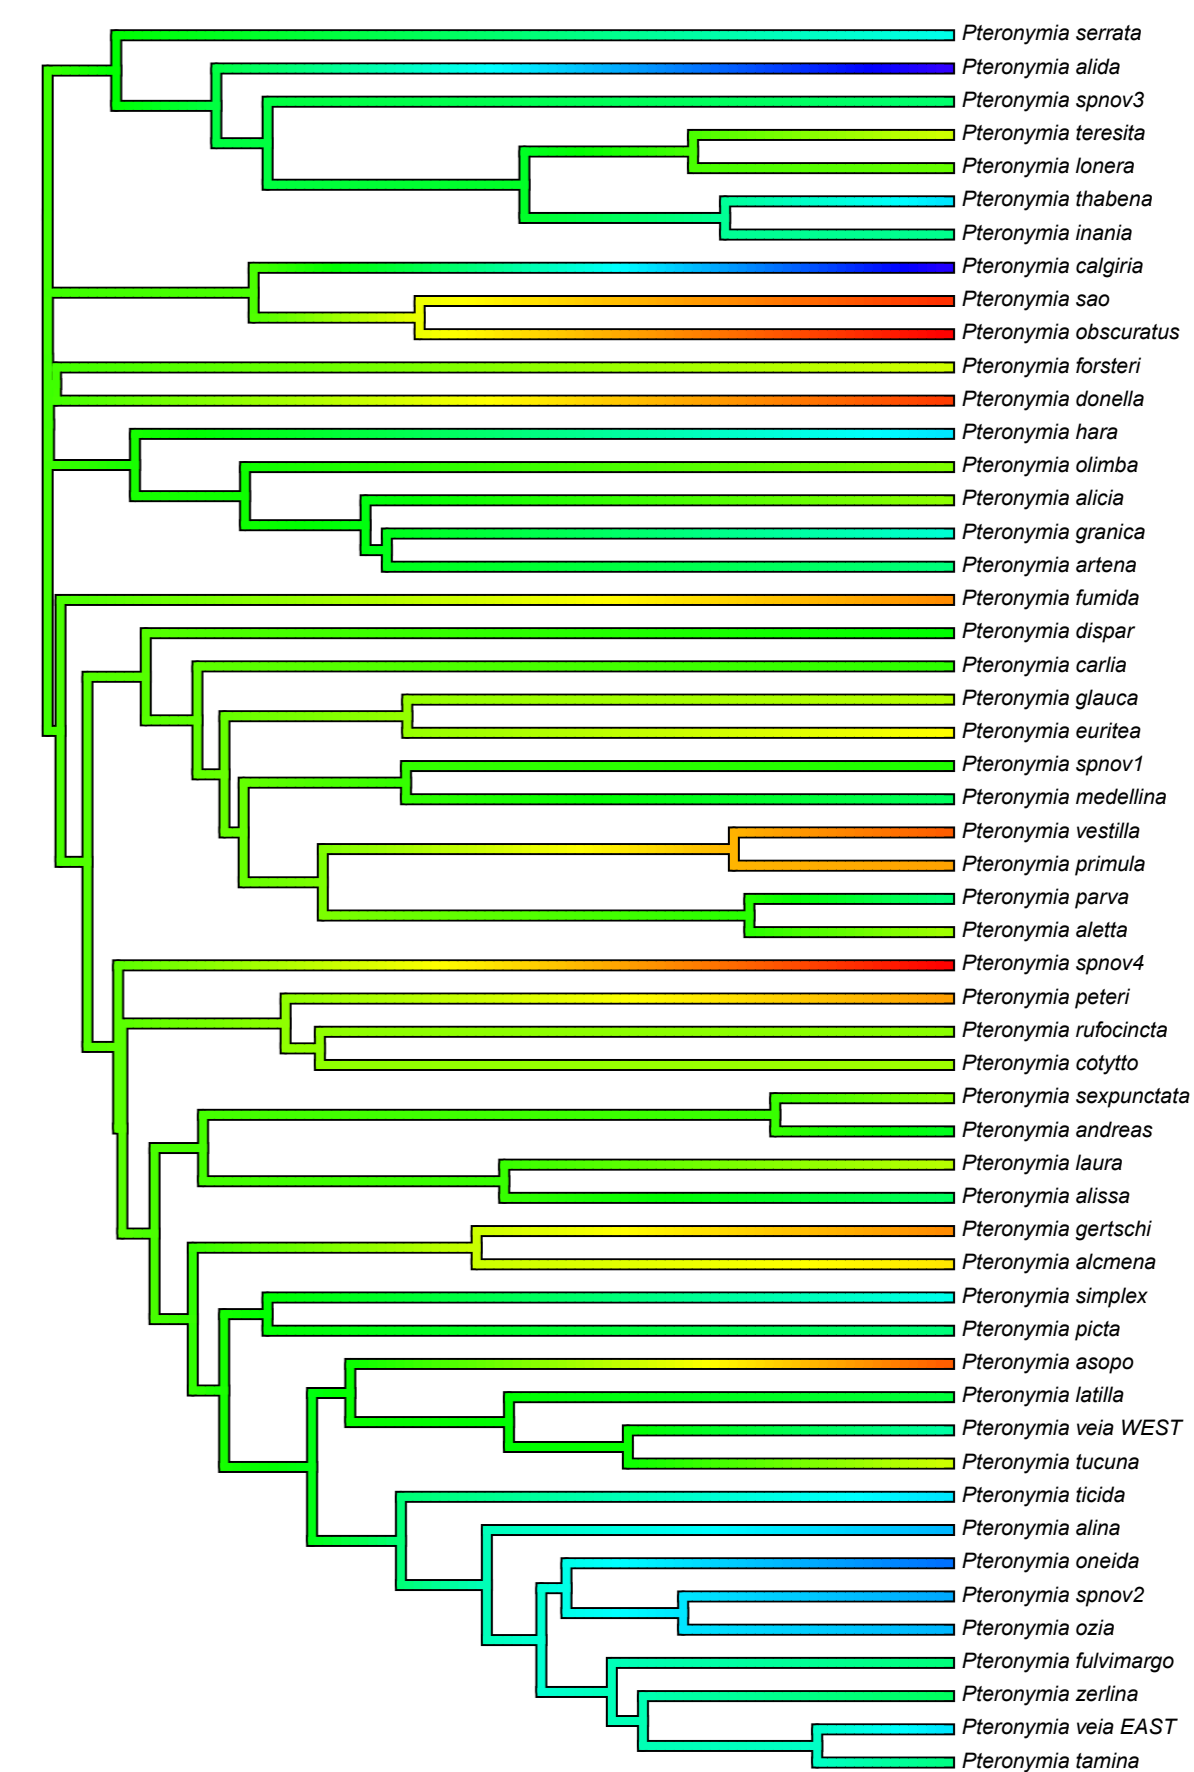

20 trait value 1730  
length=7.402

257 trait value 2091  
length=7.402

700 trait value 3000  
length=7.402

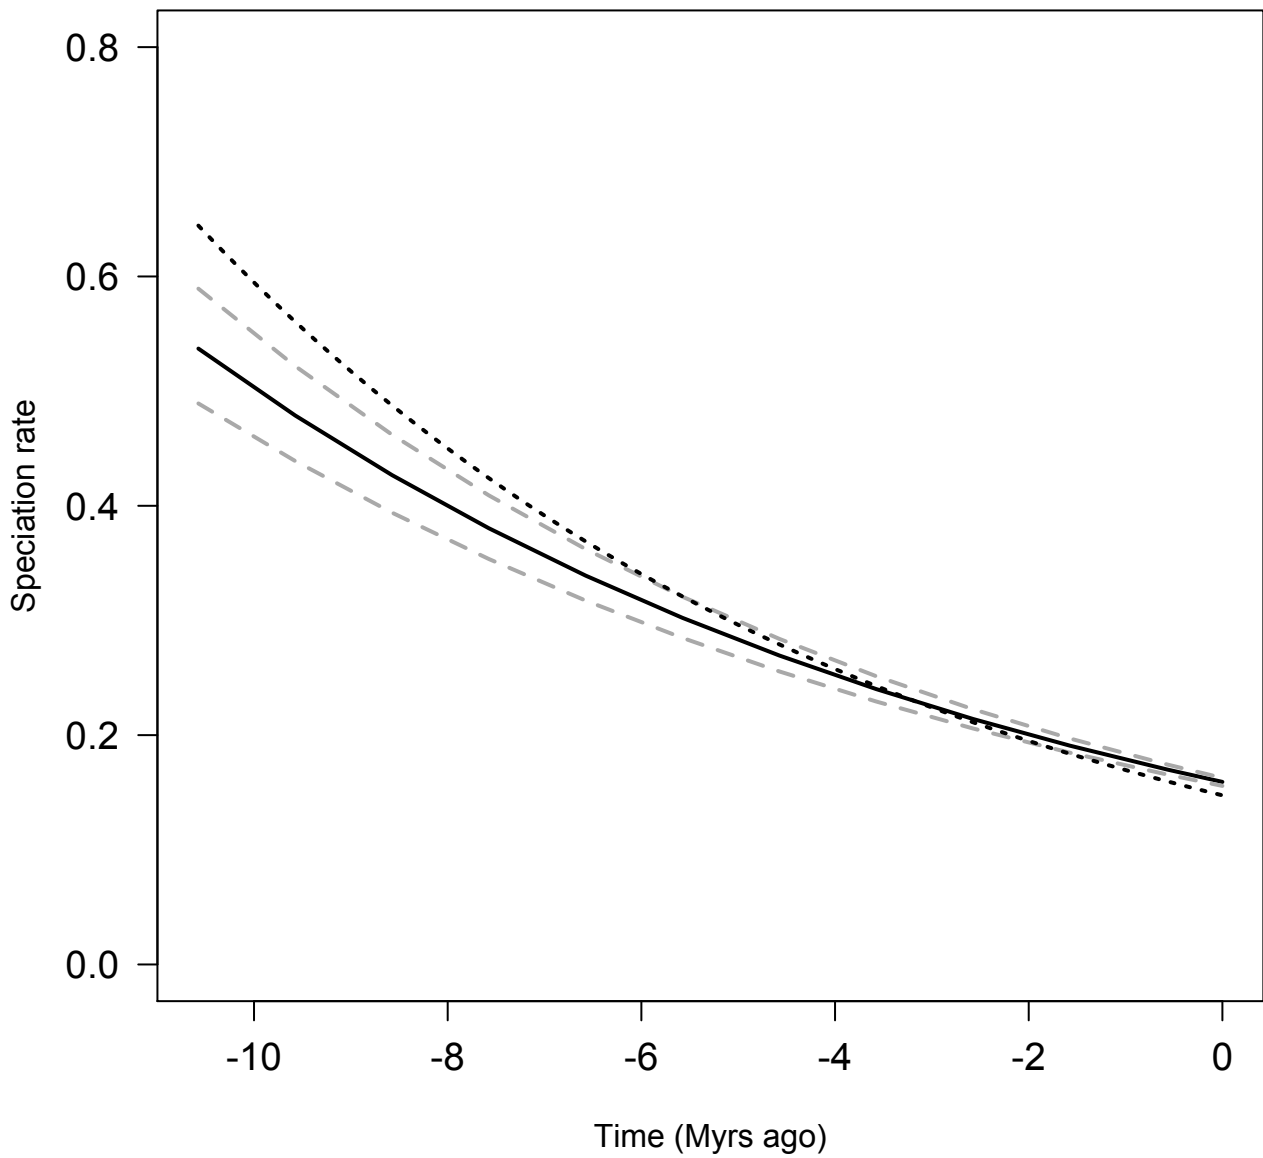

Source: https://www.biorxiv.org/content/10.1101/105882v1.full.pdf
